# Supplementary material
Source: PubMed Central journal article supplement (PMC7240095)
Supplement: IAI.00045-20-s0001.pdf [file IAI.00045-20-s0001.pdf]

**Supplemental Figure 1: Effect of ursodiol on viability and spore formation of *C. difficile*.** Culture aliquots (100  $\mu$ L) of *C. difficile* R20291, grown in BHI media, were taken over a 24 hr period and enumerated on TBHI plates to obtain total CFU/ml of total vegetative cells and spores (solid bars) and spores only (hashed bars). The positive controls (EthOH, gray bars) represent *C. difficile* grown in BHI media with ethanol and the treatments groups (blue bars) represents *C. difficile* grown in BHI media with varying concentrations of ursodiol from lowest to highest concentration (left to right). The limit of detection for this assay is  $10^2$  CFU/ml. The data presented represents triplicate experiments. Significance was determined by Welch's t-test using log transformed CFU/ml.

**Supplemental Figure 2: Ursodiol treatment alters the bile acid metabolome.** Box and whisker plots of bile acids that were significantly altered over the course of ursodiol treatment compared to mice that only received cefoperazone (based on a Two-way ANOVA with Tukey's multiple comparisons post hoc test). An n=3 mice/treatment group were then selected for bile acid metabolomic analysis.

**Supplemental Figure 3: No effect with corn oil vehicle alone on CDI in mice. (A)** Baseline weight loss of cefoperazone treated mice challenged with *C. difficile* pretreated with (white, *C. diff* + corn oil) and without corn oil vehicle (red, *C. diff* only) (n=8 mice/treatment group). **(B)** *C. difficile* bacterial load in feces and **(C)** cecal content over the first 2 days post challenge. Solid boxes represent total vegetative cells and spores and hashed boxes represent spores only. Significance was determined by a two-way ANOVA test.

**Supplemental Figure 4: Total histologic scores were not significantly different with ursodiol pretreatment.** Histopathologic scoring of murine cecum and colon throughout CDI. Total histologic scores were calculated by adding all three scores from parameters assessed: epithelial damage, inflammation, and edema. Significance was determined by a two-way ANOVA with Sidak's multiple comparisons *post hoc* test. Error bars represent the standard deviations from the mean.

**Supplemental Figure 5: Ursodiol alters the host inflammatory transcriptome of the colon early during CDI. (A)** Venn diagram depicting the mRNA expression fold change comparing the ursodiol pretreated to untreated mice in colonic tissue at day 2 post challenge with *C. difficile*, from two independent experiments performed with a total of n=12 mice/treatment group. Of the 261 genes evaluated, a total of 139 colonic genes had significant gene expression fold changes (increased expression, red; decreased expression, green). **(B)** Volcano plots highlighting genes whose transcript levels changed by greater than 1-fold and met the significant threshold  $p \leq 0.05$ . Genes highlighted in red had increased transcript levels, while those highlighted in green had decreased levels. Blue points represent genes whose results were significant but did not meet the specify fold change. Black points represent genes whose results failed to meet the significance threshold. **(C)** Colonic inflammatory transcriptome heatmap of calculated z-scores for log<sub>2</sub> transformed count data of mRNA expression levels (y-axis) comparing ursodiol pretreated (blue) to untreated mice (red). Dendrograms represent unsupervised clustering. **(D)** mRNA expression fold differences in increased expression (red) and decreased expression (green) of genes involved with NF- $\kappa$ B signaling in colonic tissue comparing ursodiol pretreated to untreated mice.



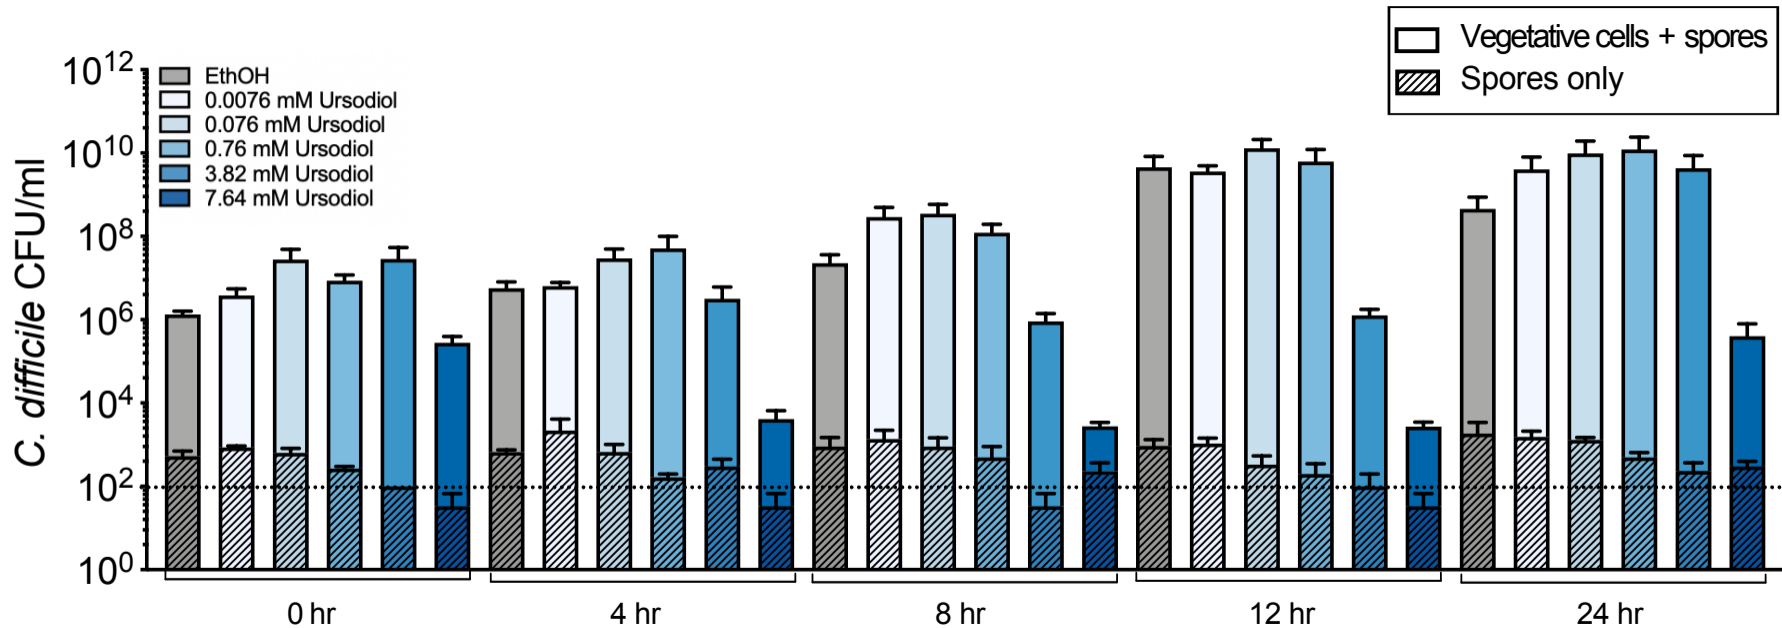

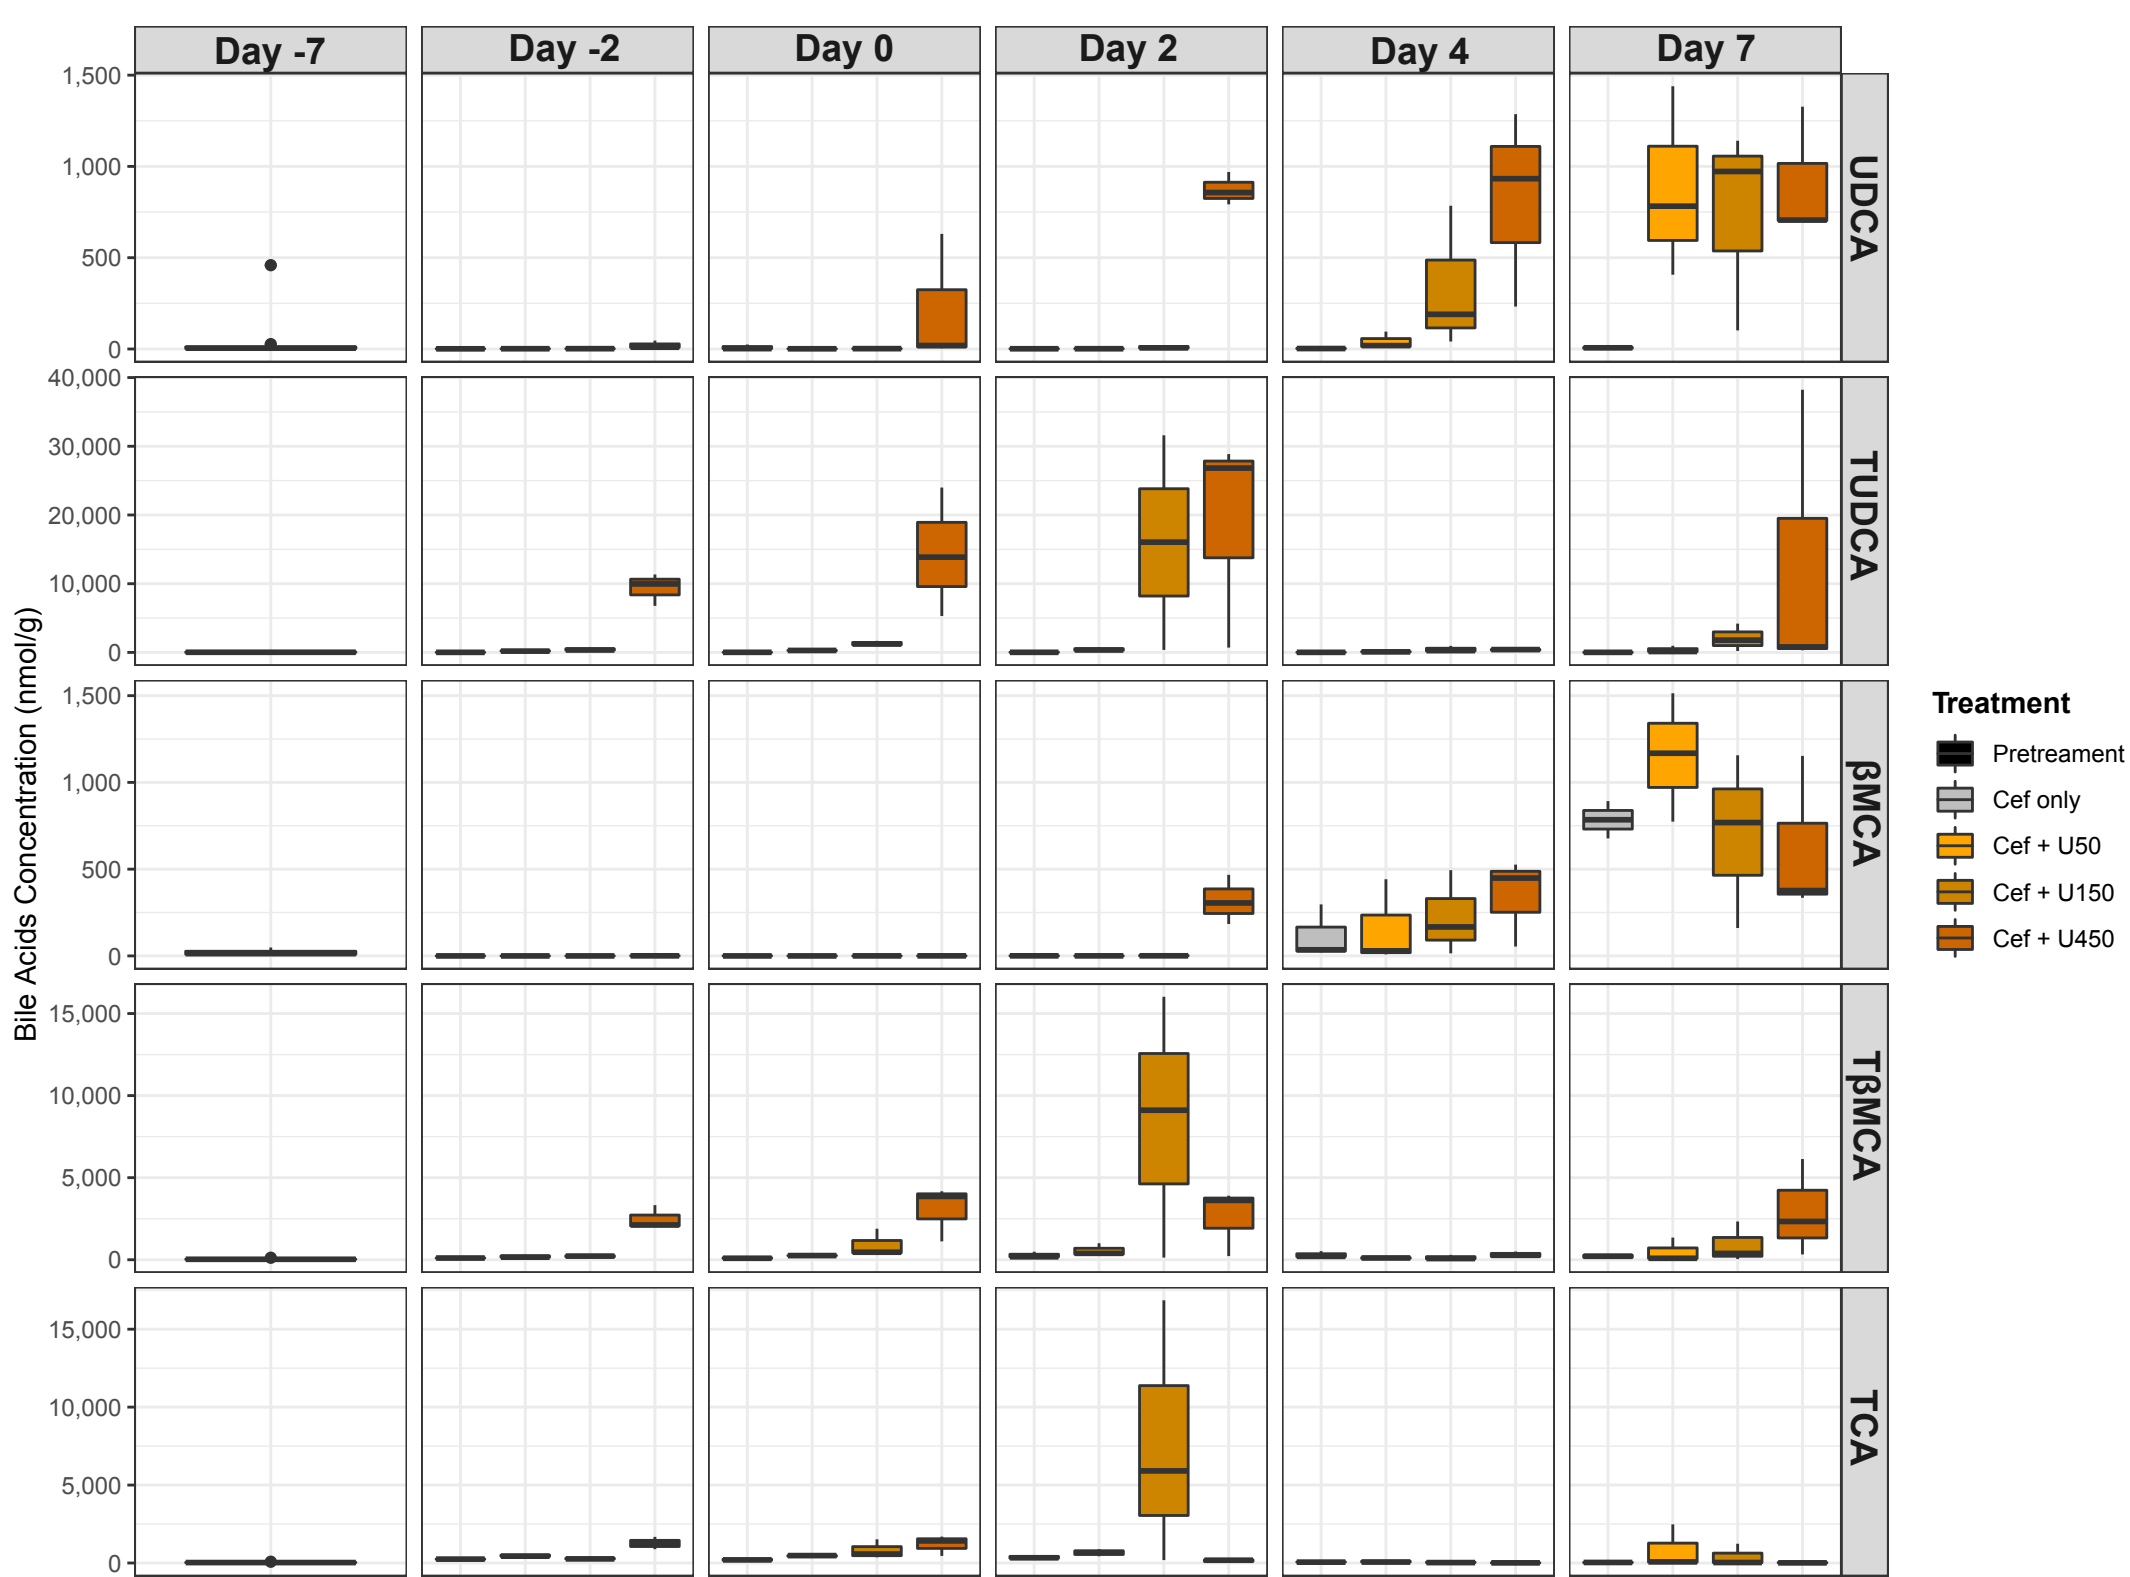

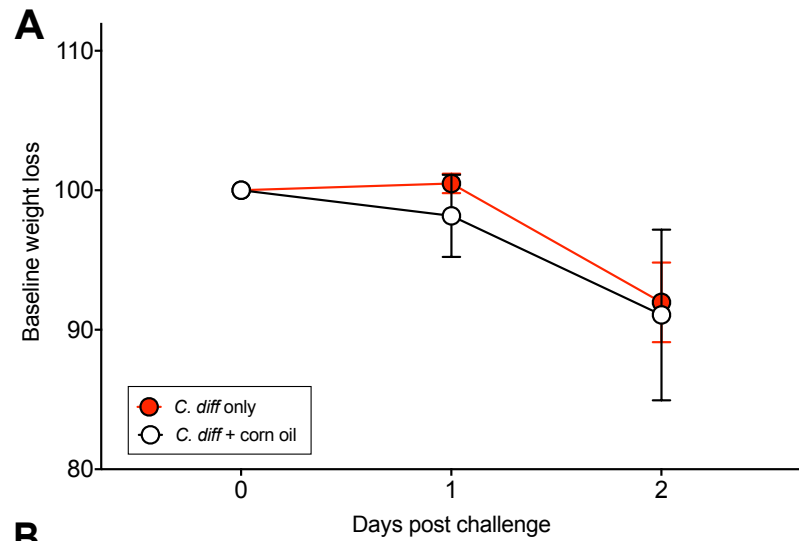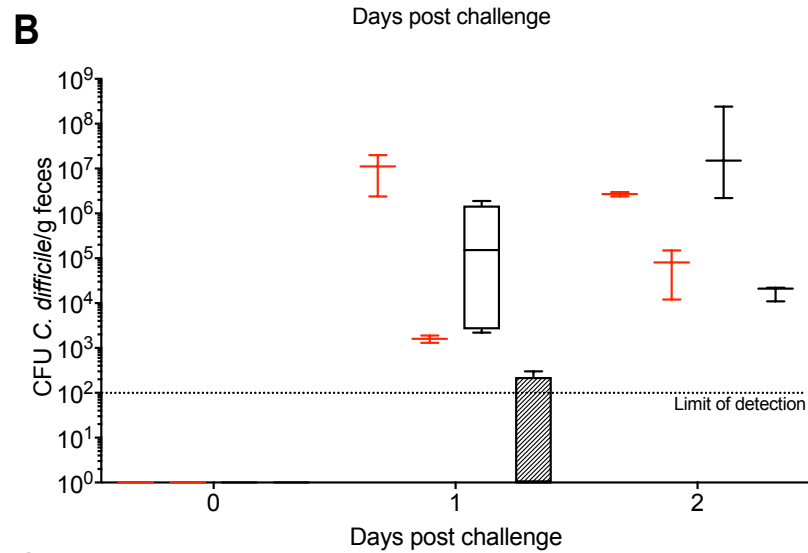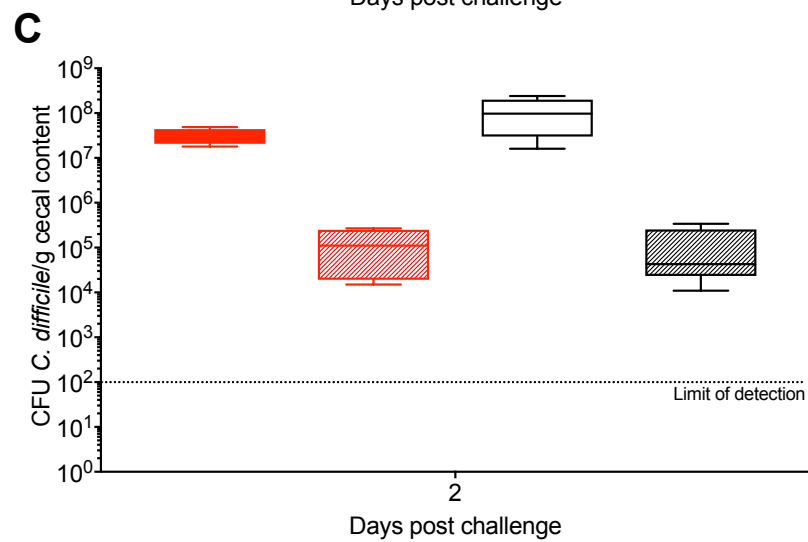

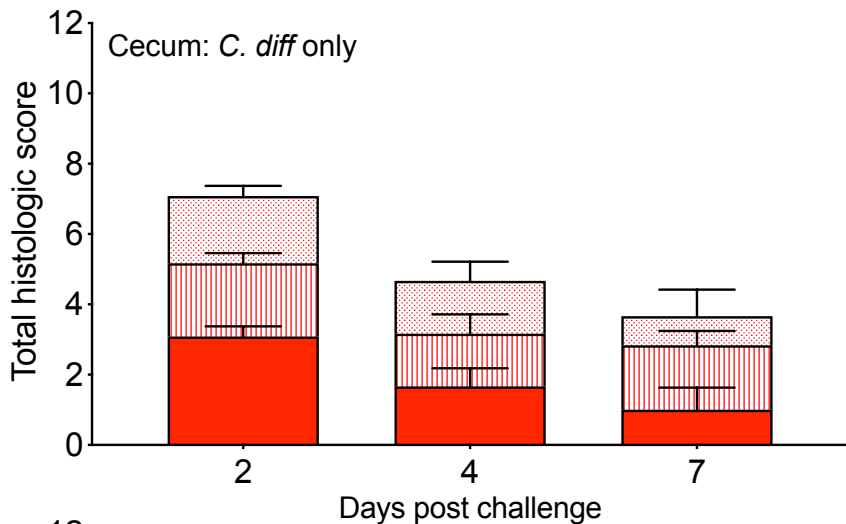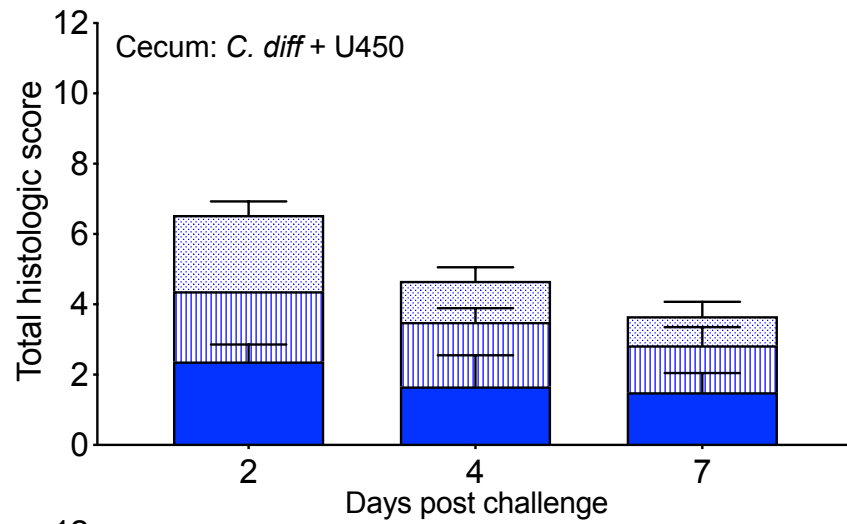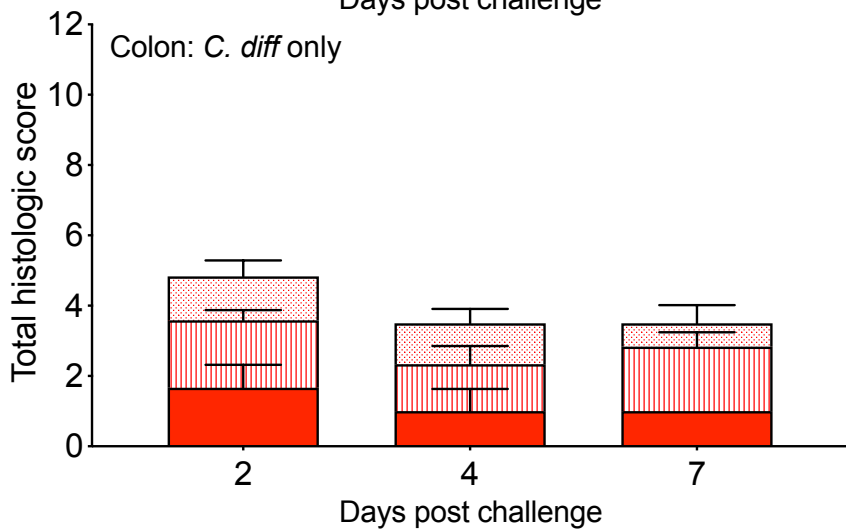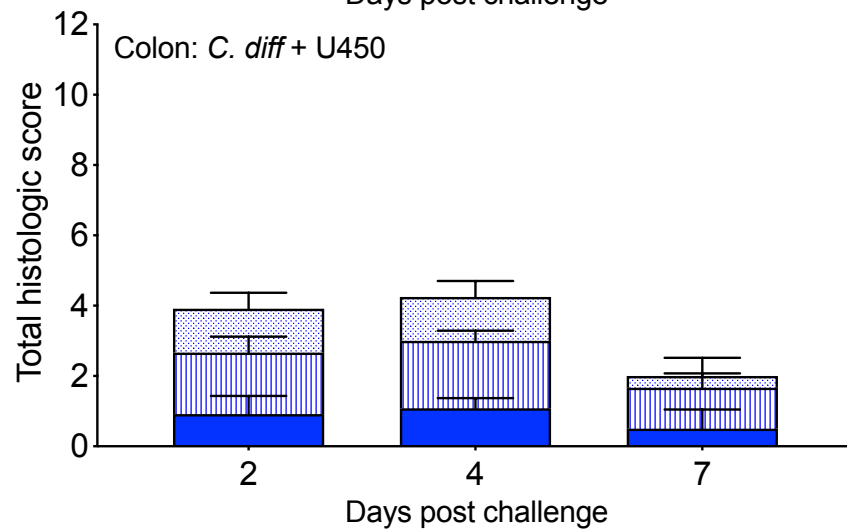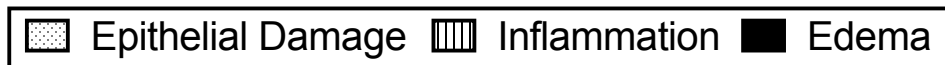

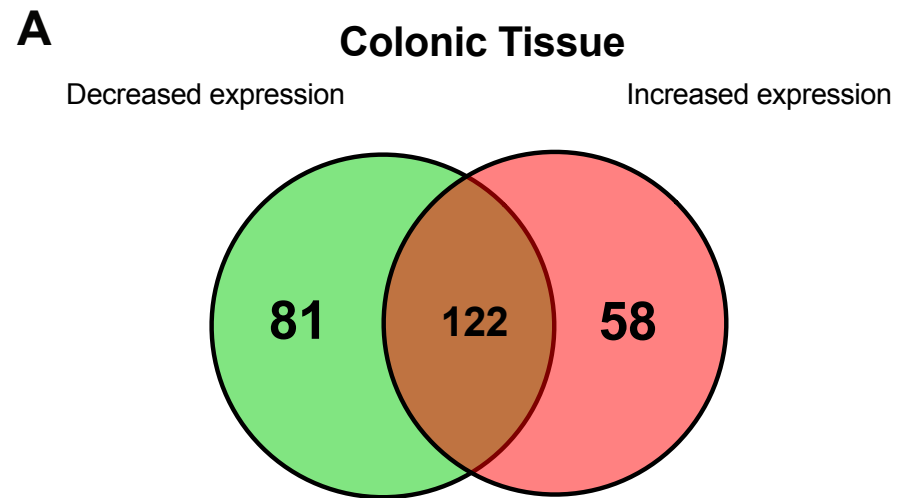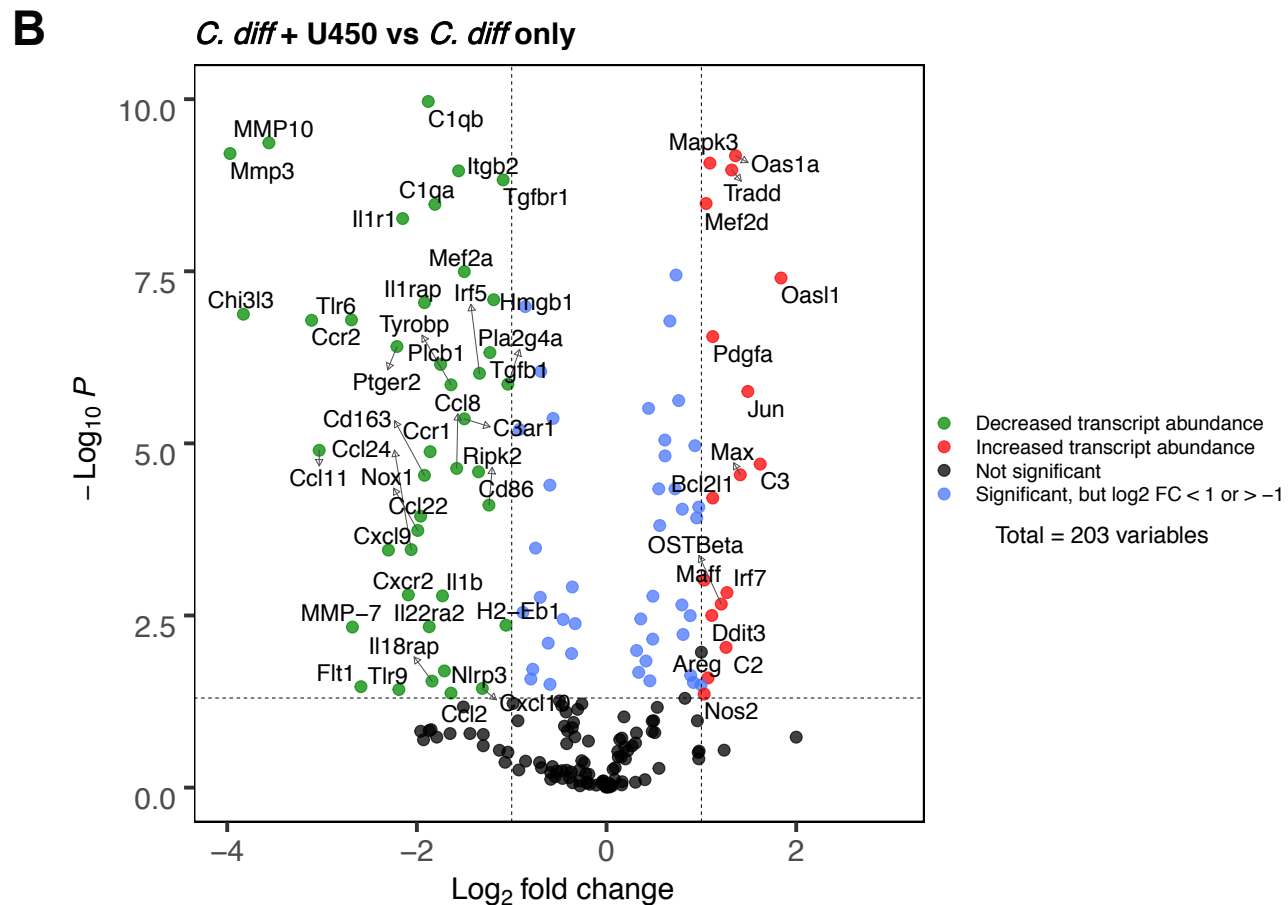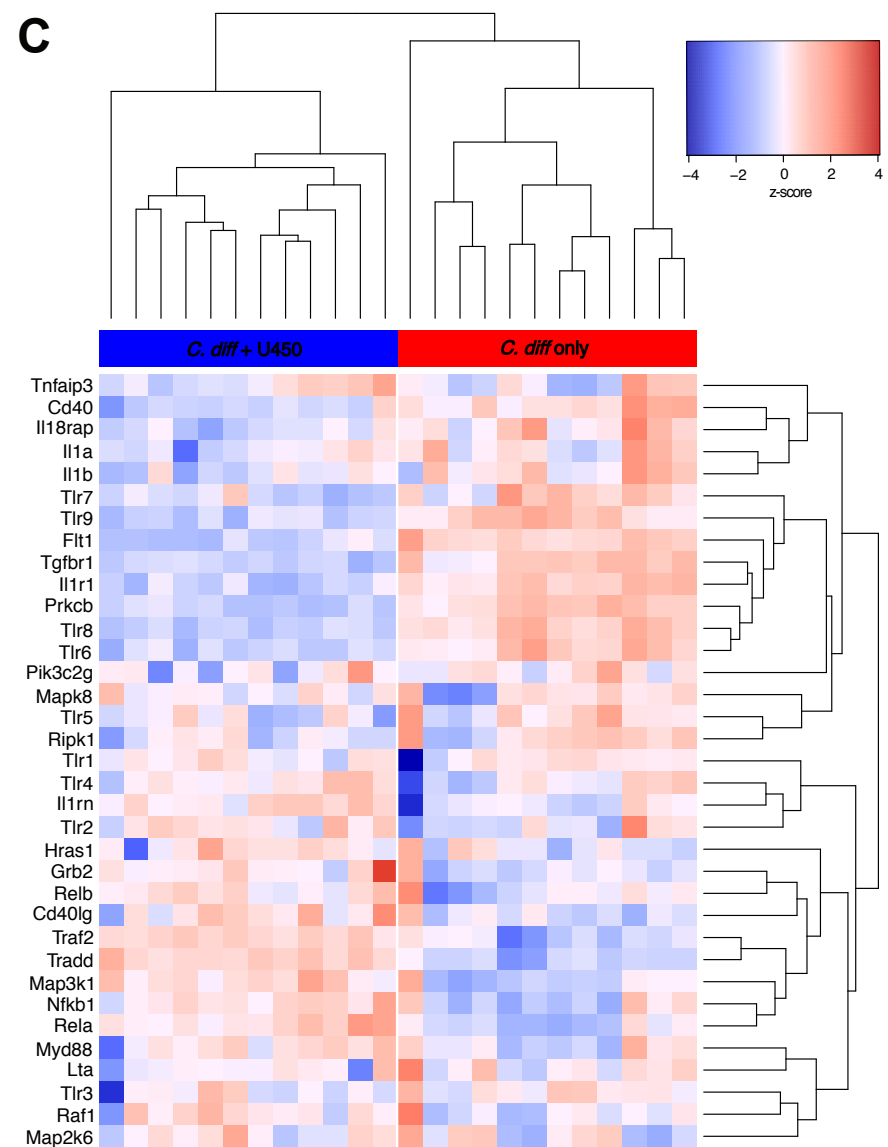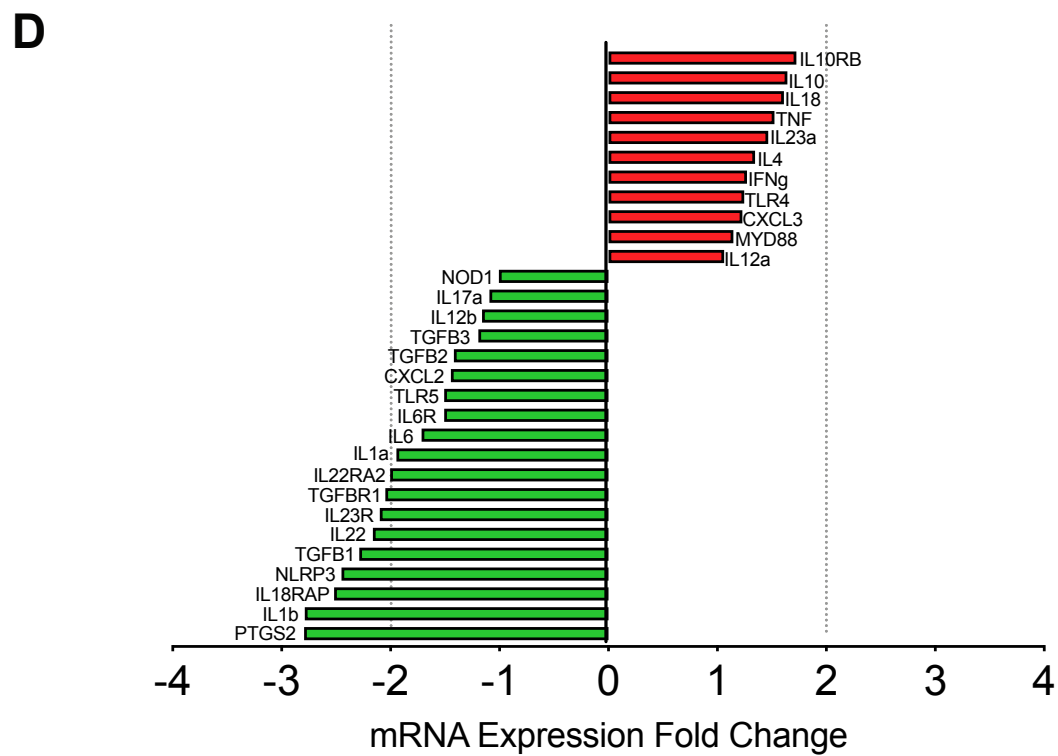



# Supplemental Table 1: Nanostrings nCounter Mouse Inflammation V2 Panel Gene List

## Continue Table S1: Nanostring nCounter SC Mouse Inflammation V2 Panel Gene List

| Gene   | Accession     | Gene Name                                                                      | Function                                                                                                                                                                                                                                                                                                                                                                | Sequence                                                                        | Category                                    |
|--------|---------------|--------------------------------------------------------------------------------|-------------------------------------------------------------------------------------------------------------------------------------------------------------------------------------------------------------------------------------------------------------------------------------------------------------------------------------------------------------------------|---------------------------------------------------------------------------------|---------------------------------------------|
| Ccl2   | NM_011333.3   | A1323594, HC11, JE, MCAF, MCP-1, MCP1, SMC-CF, Sycp2, Sgk1                     | Extracellular Region, Cytoplasm, Cell Soma, Extracellular Space, Negative Regulation Of Angiogenesis, Response To Heat, Inflammatory Response, Immune Response, Angiogenesis, Positive Regulation Of T Cell Activation, Regulation Of Cell Shape, Cellular Homeostasis, Anti Apoptosis, Transforming Growth Factor Beta Receptor Signaling Pathway, Cytokine And Ch...  | TCTTCAGCACCTTTGATGTGAAGTTGACCCGTAATCTGAAGACTATGACATCCACTTCTTCCAAACCCCTCAA       | chemokine (C-C motif) ligand 2              |
| Ccl20  | NM_016960.1   | CK64, LARC, MIP-3A, MIP-3(a), MIP3A, ST38, Sycp20, exodus-1                    | Extracellular Region, Extracellular Space, Inflammatory Response, Immune Response, Chemokine Activity, Cytokine Activity                                                                                                                                                                                                                                                | GCAGCAAGCAACTAGCACTGGCTCTGTACTACAGACGCGCTCTCTCCAGAGATTTGGTGGTTCAACAAGA          | chemokine (C-C motif) ligand 20             |
| Ccl22  | NM_009137.2   | ABCD-1, DCBCK, MDC, Sycp22                                                     | Extracellular Region, Extracellular Space, Inflammatory Response, Immune Response, Chemokine Activity, Cytokine Activity                                                                                                                                                                                                                                                | CCAGATTAACAATCCACCCCTCTTCAACACATGCTAGGGTCTTTACTTCTCTGCCCAACACCTTGACTCTGGC       | chemokine (C-C motif) ligand 22             |
| Ccl24  | NM_019577.4   | CK6-6, MPFIF-2, Sycp24                                                         | Extracellular Region, Cytoplasm, Cytosol, Extracellular Space, Soluble Fraction, Cell Activation, Positive Regulation Of Transcription From Rna Polymerase II                                                                                                                                                                                                           | CTGGATGCCAAGAAAAACAGCCTTCTAAAGGGGCCAAGGCAAGTGAAGAACCAAGTCTTCCAGACAGCCCGTG       | chemokine (C-C motif) ligand 24             |
| Ccl3   | NM_011337.1   | A1323804, G0S19-1, LD78alpha, MIP-1alpha, MIP1-(a), MIP1-alpha, Mip1a, Sycp3   | Promoter, Response To Toxin, Calcium Mediated Signaling, Behavior, Calcium Ion Transport, Leukocyte Chemotaxis, Cell Cell Signaling, Inflammatory Response, Immune Response, Regulation Of Cell Shape...                                                                                                                                                                | TGTGTCACTCGTCAACATCATGAAGTCTCCACCAGCTCCCTGGCTGCTTCTCTGTACCCAGACCTGCAACCA        | chemokine (C-C motif) ligand 3              |
| Ccl4   | NM_013652.1   | AT744.1, Act-2, MIP-1B, Mip1b, Sycp4                                           | Extracellular Region, Extracellular Space, Soluble Fraction, Response To Toxin, Leukocyte Chemotaxis, Inflammatory Response, Immune Response, Chemokine Activity, Cytokine Activity                                                                                                                                                                                     | TTCTCCAGCACTAAGGCTCTGACCCCTCCACTTCTGCTGTTCTCTTACACCTCCGGCAGCTTCAAGAAAGCTTTG     | chemokine (C-C motif) ligand 4              |
| Ccl7   | NM_013654.2   | MCP-3, Sycp7, fic, marc, mp3                                                   | Extracellular Region, Extracellular Space, Inflammatory Response, Immune Response, Regulation Of Cell Shape, Hepatin Binding, Chemokine Activity, Cytokine Activity                                                                                                                                                                                                     | ACAGAAGGTCACCCAGTAGTCGCTGCTCCGGGAAGCTGTATCTCAAGCAAAAAGGGGATGAAGCTGTGTCT         | chemokine (C-C motif) ligand 7              |
| Ccr1   | NM_009912.4   | Cmkbr1, Mip-1a-R                                                               | External Side Of Plasma Membrane, Membrane, Integral To Membrane, Plasma Membrane, Signal Transduction, Calcium Ion Transport, Myeloid Cell Differentiation, Leukocyte Chemotaxis, Cell Cell Signaling, Inflammatory Response, Immune Response, Eicosanoid G Protein Coupled Receptor Protein Signaling Pathway, G Protein Coupled Receptor Activity, Receptor Activity | CTTCTGATCAGACCATAGGTTCAACCAAGGAAGGCTGAAGAGAAATGAGGAGACAGATATATAGTCTCCAAGA       | chemokine (C-C motif) receptor 1            |
| Ccr2   | NM_009915.2   | Cc-ckr-2, Ccr2a, Ccr2b, Ckr2, Ckr2a, Ckr2b, Cmkbr2, mlsr                       | Membrane, Cytosol, Perinuclear Region Of Cytoplasm, Integral To Membrane, Integral To Plasma Membrane, Cell Soma, Dendrite, Plasma Membrane, Signal Transduction, Regulation Of Cell Migration, Hemopoiesis, Negative Regulation Of Angiogenesis, Inflammatory Response, Immune Response, Angiogenesis, Positive Regulation Of T Cell Activation, Cellular Homeostasis  | ATGAACATACATAGACCTCAGGATTAACAGGACCTGTGGTTGTGTCTGTGGGCTATCCAAACATGGTGATTT        | chemokine (C-C motif) receptor 2            |
| Ccr3   | NM_009914.4   | CC-CXR3, CXR3, Cmkbr12, Cmkbr3                                                 | Membrane, Integral To Membrane, Endosome, Extracellular Space, Plasma Membrane, Signal Transduction, Positive Regulation Of Angiogenesis, G Protein Coupled Receptor Protein Signaling Pathway, G Protein Coupled Receptor Activity, Receptor Activity                                                                                                                  | CTATATTTTATTATCTGGGACACAGCCCTAGAATCTCAGAGAGTGTCTCTGTGATTGAAGTGTGCACTTATAGA      | chemokine (C-C motif) receptor 3            |
| Ccr4   | NM_009916.2   | CC-CXR4, CHEMR1, Cmkbr4, LESTR, Sdf1r                                          | External Side Of Plasma Membrane, Membrane, Integral To Membrane, Cell Soma, Plasma Membrane, Signal Transduction, Inflammatory Response, G Protein Coupled Receptor Protein Signaling Pathway, G Protein Coupled Receptor Activity, Receptor Activity                                                                                                                  | GCTTGTAGAAGAAGCTCGTGGTCCAGAGAGGTTGAATGDCCTGTAATCTGACTCTCCGGGATAAGGCCAA          | chemokine (C-C motif) receptor 4            |
| Ccr7   | NM_007719.2   | CD197, Cdxr197, Cmkbr7, EBH1, Ebr1h                                            | External Side Of Plasma Membrane, Membrane, Integral To Membrane, Plasma Membrane, Signal Transduction, Activation Of Jnk Activity, Positive Regulation Of T Cell Proliferation, Inflammatory Response, Immune Response, Actin Cytoskeleton Organization And Biogenesis, G Protein Coupled Receptor Protein Signaling Pathway, Cell Maturation, G Protein Coupled       | CCAGATGGTTTGGTCTGCTGCTGCTGCTGCTGCTGCTGCTGCTGCTGCTGCTGCTGCTGCTGCTGCTGCTGCTG      | chemokine (C-C motif) receptor 7            |
| Cd163  | NM_053094.2   | CD163v2, CD163v3                                                               | Extracellular Region, Membrane, Integral To Membrane, Plasma Membrane, Inflammatory Response, Receptor Mediated Endocytosis                                                                                                                                                                                                                                             | TCAGCCGCACTTGTTGTGGAGCCTCTATTGGTCTCTCTGCTGCTGCTGCTGCTGCTGCTGCTGCTGCTGCTGCTG     | CD163 antigen                               |
| Cd4    | NM_013488.2   | L3T4, Ly-4                                                                     | External Side Of Plasma Membrane, Cell Surface Membrane, Endoplasmic Reticulum Membrane, Integral To Membrane, Lipid Raft, Endoplasmic Reticulum Lumen, Plasma Membrane, Cell Surface Receptor Linked Signal Transduction Go 0007168, T Cell Differentiation, Regulation Of T Cell Activation, Cytokine Production, Immune Response, Positive Regulation Of T Cell      | AAGAAGGTCTCCGACAAAAGTCCACCAAGACCTCAAGCTCAGCTGAAGGAGGAGAGAACCTCCACTCACCCCTAAGATA | CD4 antigen                                 |
| Cd40   | NM_011611.2   | A1326936, Bp50, HG30, HGM1, IGM, IMD3, T-BAM, TRAP, Tnfrsf5, p50               | External Side Of Plasma Membrane, Extracellular Region, Membrane, Integral To Membrane, Extracellular Space, Plasma Membrane, Signal Transduction, B Cell Differentiation, Inflammatory Response, Immune Response, Anti Apoptosis, Cytokine Activity                                                                                                                    | GCTGCCCCAACCCCGTACTCTGATTTGATCTCCCTGGCACTTCAAGTAAAGGAGGAGAACCAATCCAGAGGGTTG     | CD40 antigen                                |
| Cd40lg | NM_011616.2   | CD154, CD40-L, Cd40L, HGM1, IGM, IMD3, Ly-62, Ly62, T-BAM, TRAP, Tnfrsf5, gp39 | External Side Of Plasma Membrane, Extracellular Region, Membrane, Integral To Membrane, Extracellular Space, Plasma Membrane, Signal Transduction, B Cell Differentiation, Inflammatory Response, Immune Response, Anti Apoptosis, Cytokine Activity                                                                                                                    | AGCAGTGGATCTGAGAAATCTACTCAAGCGCGAAATCCCAACAGTCTCCCTCCAGCTTGGAGCAGCAGTCTGTT      | CD40 ligand                                 |
| Cd55   | NM_010016.2   | Def, DaF-GPI, Def1, GPI-DAF                                                    | External Side Of Plasma Membrane, Cell Surface Membrane, Anchored To Membrane, Lipid Raft, Apical Plasma Membrane, Plasma Membrane, Innate Immune Response, Negative Regulation Of Catalytic Activity, Enzyme Inhibitor Activity                                                                                                                                        | ACAGTTAAAGTTTACAGAACCCAGCATGACTCTTCAACAGAACACAGTACGCTCAACAAAGAACATCTACAGAC      | CD55 antigen                                |
| Cd86   | NM_019388.3   | B7, B7-2, B7.2, B70, CLS1, Cd282, ETC-1, Ly-58, Ly58, MB7, MB7-2, TS1A-2       | External Side Of Plasma Membrane, Membrane, Integral To Membrane, Plasma Membrane, Positive Regulation Of T Cell Proliferation, Defense Response To Virus, B Cell Activation, T Cell Activation, Receptor Binding, Receptor Activity                                                                                                                                    | CAAAACATAAGCGTGAAGTGGTGAATTTTGGCAGGACGCAAGAAAGTGGTCTGTGACAGACATTTGGG            | CD86 antigen                                |
| Cdc42  | NM_008981.1   | A1747189, AU018915                                                             | Golgi Membrane, Membrane, Cytoplasm, Cytoskeleton, Cell Projection, Apical Part Of Cell, Secretory Granule, Plasma Membrane, Nervous System Development, Regulation Of Protein Kinase Activity, Regulation Of Mitosis, Regulation Of Protein Metabolic Process, Actin Cytoskeleton Organization And Biogenesis, Cell Cell Adhesion, Endosome Transport, Establishmen    | TGATGGTGGAGGCCATACACTCTTGAAGTCTTGTACTCGAGGCGAAGGAGATTAGCAGACTACGACCCGTA         | cell division cycle 42                      |
| Cebpb  | NM_008983.3   | CIEPbeta, CRP2, IL-6DBP, LAP, LIP, NF-JL6, NF-M, NFkB                          | Cytoplasm, Nucleus, Nuclear Matrix, Nuclear Chromatin, Positive Regulation Of Transcription, DNA Dependent, Positive Regulation Of Transcription From Rna Polymerase II Promoter, Transcription Dna Dependent, Negative Regulation Of Transcription Dna Dependent, Regulation Of Transcription Dna Dependent, Anti Apoptosis, Neuron Differentiation, Protein Homod     | GGGGACCGGGGCGACGCACTGACAGGCGACCGGGTTGGGAGCTTATGCAATCCGGATCAACATGGCTGGAG         | CCAAT/enhancer binding protein (CEBP), beta |
| Cfb    | NM_008198.2   | A195813, A1255840, B, Bf, Cf, Fb, Hf-Bf                                        | Extracellular Region, Extracellular Space, Proteolysis, Cell Proliferation Go 0008283, Innate Immune Response, Serine Type Peptidase Activity, Peptidase Activity, Serine Type Endopeptidase Activity                                                                                                                                                                   | GGTGGGCGCTGTGTGACTCGTGAACATCAATGCTTACCTTCCAAAAGGACATGAGCATCATGTTTAAAGT          | complement factor B                         |
| Cfd    | NM_013459.1   | Adn, DF                                                                        | Extracellular Region, Extracellular Space, Proteolysis, Notch Signaling Pathway, Innate Immune Response, Serine Type Peptidase Activity, Endopeptidase Activity, Peptidase Activity, Serine Type Endopeptidase Activity                                                                                                                                                 | AGTGTCAATCATGACCGGACCACTGCAACTCGCAGTACACAGTACAGCGGGTGTACCACTTAACATGATGTGTG      | complement factor D (adpsin)                |
| Cfl1   | NM_007687.5   | AA959946, Cof                                                                  | Membrane, Cytoplasm, Nucleus, Cytoskeleton, Lamellipodium, Cell Projection, Leading Edge, Cortical Actin Cytoskeleton, Plasma Membrane, Actin Filament Organization, Cytokinesis, Protein Import Into Nucleus, Regulation Of Cell Morphogenesis, Cytoskeleton Organization And Biogenesis, Protein Amino Acid Phosphorylation, Actin Binding                            | TGCTGCCAACTTCAACCAATAGTACTGCTGCTGCTGCTGCTGCTGCTGCTGCTGCTGCTGCTGCTGCTGCTGCTG     | cofilin 1, non-muscle                       |
| Creb1  | NM_133828.2   | 2310001E10R1K, 352640Z2H1R1K, AV083133, Creb, Creb-1                           | Chromatin, Nucleus, Nuclear Chromatin, Mitochondrion, Transcription Factor Complex, Positive Regulation Of Transcription From Rna Polymerase II Promoter, Transcription Dna Dependent, Axonogenesis, Regulation Of Transcription Dna Dependent, Transforming Growth Factor Beta Receptor Signaling Pathway, Protein Amino Acid Phosphorylation, Transcription Pro       | CATGTCAACACAGGGTCCACTTCCAAAGTGAAGTCAAGCCAGGAAAGCAAGTCTGCTGCTGCCACCTTG           | cAMP responsive element binding protein 1   |
| Op     | NM_007768.4   | A1255847                                                                       | Extracellular Space, Protein Polymerization, Protein Homodimerization Activity, Low Density Lipoprotein Binding                                                                                                                                                                                                                                                         | TTGTATTCCCAAGGATCAATGATCTTACTGTGTCTGTGGAAGCAGTGAAGAAGCCACTGAACACCTTACTGT        | reactive protein, pentraxin-related         |
| Csf1   | NM_01113530.1 | C87615, Csfm, MCSF, op                                                         | Extracellular Region, Membrane, Perinuclear Region Of Cytoplasm, Integral To Membrane, Receptor Complex, Extracellular Space, Plasma Membrane, Positive Regulation Of Cell Proliferation, Positive Regulation Of Cellular Protein Metabolic Process, Inflammatory Response, Cell Proliferation Go 0005283, Positive Regulation Of Cell Migration, Innate Immune R       | TCCAGCTGTGGAGAAATCAAGAACTCTTAAAGAAACAAAGATCTCTTGAAGAGACTGAACATTTTACCAA          | colony stimulating factor 1 (macrophage)    |

## Continue Table S1: Nanostring nCounter SC Mouse Inflammation V2 Panel Gene List

| Gene     | Accession      | Symbol                                                                                                                                            | Function                                                                                                                                                                                                                                                                                                                                                                              | Sequence                                                                                        | Notes                                                                                    |
|----------|----------------|---------------------------------------------------------------------------------------------------------------------------------------------------|---------------------------------------------------------------------------------------------------------------------------------------------------------------------------------------------------------------------------------------------------------------------------------------------------------------------------------------------------------------------------------------|-------------------------------------------------------------------------------------------------|------------------------------------------------------------------------------------------|
| Csf2     | NM_009869.4    | Csf2m, GM-CSF, Gm-CSF, MGI-HGM                                                                                                                    | Extracellular Region, Extracellular Space, Positive Regulation Of Cell Proliferation, Negative Regulation Of Apoptosis, Regulation Of Gene Expression, Immune Response, Regulation Of Cell Proliferation, Cytokine Activity, Growth Factor Activity                                                                                                                                   | AAGTGTCTCTAACGAGTCTCTCCAGAAAGCTAACATGTGTGACAGCCCGCTGAAGATATGACAGCGGTCTACGGGGCAATTTCAACCAACTCAA  | colony stimulating factor 2 (granulocyte-macrophage)                                     |
| Csf3     | NM_009971.1    | Csf3, G-CSF, MGI-HG                                                                                                                               | Extracellular Region, Extracellular Space, Positive Regulation Of Cell Proliferation, Immune Response, Enzyme Binding, Cytokine Activity, Growth Factor Activity                                                                                                                                                                                                                      | TGTTCTCTCTCTAGACAGAGAGAAAGGCTCTGTGTCTCTCTGTGGAGCCGGAGGAGGATGGTAAATACCAAGTATTGATCTCTGCTGCTGC     | colony stimulating factor 3 (granulocyte)                                                |
| Cxcl1    | NM_008176.1    | Fsp, Gc1, KC, Mgsa, N51, Szyb1, gro                                                                                                               | Extracellular Region, Extracellular Space, Inflammatory Response, Immune Response, Acute Inflammatory Response, Chemokine Activity, Cytokine Activity, Growth Factor Activity                                                                                                                                                                                                         | TGCTAGTAAAGGGTGTGGCGAAAGAGTGCAGAGATAGATTTGATATTATTTGATATTAGGGTGAAGCATGTGTGGAGGCTGTGT            | chemokine (C-X-C motif) ligand 1                                                         |
| Cxcl10   | NM_021274.1    | C7, CRG-2, INP10, IP-10, IP10, Ifi10, Szyb10, gp1-10, mob-1                                                                                       | External Side Of Plasma Membrane, Extracellular Region, Extracellular Space, Positive Regulation Of Cell Proliferation, Signal Transduction, Negative Regulation Of Angiogenesis, Defense Response To Virus, Inflammatory Response, Immune Response, Protein Secretion, Positive Regulation Of Cell Migration, Chemokine Activity, Cytokine Activity                                  | AGGACGGTCCCTGCACTCATCATGATGACGGCCGAGTGAAGTGAAGGCGCATAGGAAAGCTGAATACTCCCTGCGACCTATCTCGCCACC      | chemokine (C-X-C motif) ligand 10                                                        |
| Cxcl2    | NM_009140.2    | CINC-2a, GROb, Gm2, MIP-2, MIP-2a, Mgsa-b, Mip2, Szyb, Szyb2                                                                                      | Extracellular Region, Extracellular Space, Leukocyte Chemotaxis, Inflammatory Response, Immune Response, Chemokine Activity, Cytokine Activity                                                                                                                                                                                                                                        | GGTGGGGTGGGGCAATAGATGCGATGCGTTCCTGATGGAAGGTGTGTCATGTCATCATTTTTTGTATGACACCGAGAGACTAAGACACG       | chemokine (C-X-C motif) ligand 2                                                         |
| Cxcl3    | NM_203320.2    | Dcp1, Gm1960                                                                                                                                      | Extracellular Region, Extracellular Space, Inflammatory Response, Immune Response, Chemokine Activity, Cytokine Activity                                                                                                                                                                                                                                                              | AGCTCGAAGATGTGAAGATTTGCTCAACCCCAAGGCCAGGCTTCAGATATCATCAAGAAAGACTGAAGAGGGCAAGCTCAGCTGACGG        | chemokine (C-X-C motif) ligand 3                                                         |
| Cxcl5    | NM_009141.2    | AMCF-II, ENA-78, GCP-2, LIX, Szyb5, Szyb6                                                                                                         | Extracellular Region, Extracellular Space, Cytokine Production, Inflammatory Response, Chemokine Activity                                                                                                                                                                                                                                                                             | CCGAGTGAAGTAAAGAAAGGGCTGATCTCTCCACCAGGATTTCTTTATGAACTCCGCTGTTGATGAGAAAGGGAAACATTGTCCCTGAAG      | chemokine (C-X-C motif) ligand 5                                                         |
| Cxcl9    | NM_008509.2    | BB139920, CMK, Mlg, MuMIG, Szyb9, cgp-10                                                                                                          | External Side Of Plasma Membrane, Extracellular Region, Extracellular Space, Defense Response To Virus, Cytokine Activity                                                                                                                                                                                                                                                             | TAGAACTCAGCTGTCGATGAAGTCGGTGTCTTTCTCTGGGACATCTCTCTGGAGCAGTGTGGATGTGGAGAACCTAGTGATAAGGAATGG      | chemokine (C-X-C motif) ligand 9                                                         |
| Cxcr1    | NM_178241.4    | Il8ra                                                                                                                                             | Membrane, Integral To Membrane, Plasma Membrane, Signal Transduction, Cell Surface Receptor Linked Signal Transduction, G Protein Coupled Receptor Protein Signaling Pathway, G Protein Coupled Receptor Activity                                                                                                                                                                     | TCTCTTGAAGCCACTTGATTGAAGATCTGCGAACCGCAATGACATGACCGACCCCTGTATTACTAGATCCTGGGCTTTCTCATAGTTGT       | chemokine (C-X-C motif) receptor 1                                                       |
| Cxcr2    | NM_009093.3    | CD128, CDw128, Cmkar2, Gpcr16, IL-8Rb, IL-8rb, IL8RA, Il8b, mL-8RH                                                                                | Cell Surface, Membrane, Integral To Membrane, Plasma Membrane, G Protein Signaling Coupled To Ip3 Second Messenger, Phospholipase C Activating, Positive Regulation Of Cell Proliferation, Signal Transduction, Cell Surface Receptor Linked Signal Transduction, G Protein Coupled Receptor Activity                                                                                 | CCTTGGCTGTGGCTGCATCAAGTAAATGAGTGAAGTGTTCCTCAACCCGTGGAGAGATTTCTCATAGTGAAGAGGTACTCTCACAGGAG       | chemokine (C-X-C motif) receptor 2                                                       |
| Cxcr4    | NM_009911.3    | CD184, Cmkar4, LESTR, PB-CRK, PBSF/SDF-1, Sdf1r                                                                                                   | External Side Of Plasma Membrane, Cell Surface, Membrane, Cytoplasmic Vesicle, Integral To Membrane, Endosome, Cytoplasmic Membrane, Cytoplasmic Vesicle, Leading Edge, Growth Cone, Plasma Membrane, Nervous System Development, L Cell Proliferation, Signal Transduction, Regulation Of Cell Migration, Calcium Mediated Signaling Pathway, Brain Development, Organ Morphogenesis | GTTCATTCACGATATAATGGTGGTCTCGCTCCGCCGATCGTATCTCTCTGACTGCATCACTCTCTAAGCTGCACACTCAAGGGCC           | chemokine (C-X-C motif) receptor 4                                                       |
| Cyslr1   | NM_021478.4    | BB147369, CyslT1R, Cysr1                                                                                                                          | Membrane, Integral To Membrane, Plasma Membrane, Signal Transduction, Positive Regulation Of Angiogenesis, G Protein Coupled Receptor Protein Signaling Pathway, G Protein Coupled Receptor Activity, Receptor Activity                                                                                                                                                               | TGAAGATTGGATCTGCTTCAGGAGAAAGAACACTAACTGAGTGGATGAACTGACGAGCTGAAAGCTACTCTGACACTACATAAGAACAGT      | cysteinyl leukotriene receptor 1                                                         |
| Cyslr2   | NM_001162412.1 | 2300001H05RK, CYSLR2, Chr2, Cyslr2                                                                                                                | Membrane, Integral To Membrane, Plasma Membrane, Signal Transduction, Positive Regulation Of Angiogenesis, G Protein Coupled Receptor Protein Signaling Pathway, G Protein Coupled Receptor Activity, Receptor Activity                                                                                                                                                               | GGAGGGGGTCAACDATTGTATGTCATGATCACTCTCTCTCTCTCTCTGATCACTGACCTGGGACCCCTCCACTTGGTACATGGGATA         | cysteinyl leukotriene receptor 2                                                         |
| Daxx     | NM_007829.3    |                                                                                                                                                   | Cytoplasm, Nucleus, Cytosol, Cell Cortex, Pml Body, Neuron Projection, Transcription Dna Dependent, Negative Regulation Of Transcription Dna Dependent, Regulation Of Transcription, Dna Dependent, Angiogenesis, Receptor Signaling Pathway, Apoptosis, G Protein Homodimerization Activity, Protein N-Terminal Binding, Transcription Coactivator Activity, Transcription           | CTTGGGAAAATGGAACCTGGCCATGACCGGCTGATGAGGTTCATCCAAATGATCAATGATGCAACACAGAACATGAGGGGGGAGAGAGAGA     | Fas death domain-associated protein                                                      |
| Ddx3     | NM_007837.3    | CHOP-10, CHOP10, chop, gadd153                                                                                                                    | Cytoplasm, Nucleus, Positive Regulation Of Transcription, Positive Regulation Of Transcription From Rna Polymerase II Promoter, Transcription Dna Dependent, Regulation Of Transcription, Dna Dependent, Sequence Specific Dna Binding, Transcription Factor Activity, Regul                                                                                                          | CCTGACTGAAATGGGGCACCTATCTCTCCAGAAACGAAAGAGAGAGATCAAAACCTCACTACTCTTGGACCCCTGCTCAAGCTGTAC         | DNA-damage inducible transcript 3                                                        |
| Elk1     | NM_007822.4    | Elk-1                                                                                                                                             | Transcription From Rna Polymerase II Promoter, Transcription Dna Dependent, Regulation Of Transcription, Dna Dependent, Sequence Specific Dna Binding, Transcription Factor Activity, Dna Binding                                                                                                                                                                                     | AGGGTCTCTCTTGGCTAACTACCACTGGGATACACTGCTGGCCATCAAGTCTCAAGATCTACTGCTTCTACTCTGGATTACCAAGTGTAC      | ELK1, member of ETS oncogene family                                                      |
| Fasl     | NM_010177.3    | APT1L1, CD178, CD95L, CD95L, Fas-L, Faslg, Tnfrsf6, gld                                                                                           | External Side Of Plasma Membrane, Extracellular Region, Membrane, Cytoplasmic Vesicle, Perinuclear Region Of Cytoplasm, Integral To Membrane, Lipid Raft, Cytoplasmic Membrane Bound Vesicle, Extracellular Space, Lysosome, Plasma Membrane, Positive Regulation Of Cell Proliferation, Signal Transduction, Induction Of Apoptosis By Extracellular Signals, Nega                   | CATTTAACAGGAAACCCCACTCAAGTCCACTCCCTGTGAAGTGGAGAACACATATGGAACCCCTGTGATCTGTGAAGTGAATAAGAAAGGTGGCC | Fas ligand (TNF superfamily, member 6)                                                   |
| Fil1     | NM_010228.3    | A1323757, Fil-1, VEGFR-1, VEGFR1, sFR1                                                                                                            | Golgi Apparatus, Membrane, Cytoplasm, Nucleus, Integral To Membrane, Integral To Plasma Membrane, Endosome, Plasma Membrane, Protein Amino Acid Autophosphorylation, Multicellular Organismal Development, Positive Regulation Of Map Kinase Activity, Angiogenesis, Embryonic Morphogenesis, Intracellular Receptor Mediated Signaling Pathway, Peptidyl Tyrosine                    | GAAAAGTCCGTGCTGGCTCCAAACCCACTCTCTATCCGCTGGGACGACAGACATCTCACTGACCCGCTGATGGCATCCCTGGCCGCAACATCA   | FMS-like tyrosine kinase 1                                                               |
| Fos      | NM_010234.2    | D12Rfj1, c-fos, cFos                                                                                                                              | Nucleus, Membrane Fraction, Transcription Factor Complex, Positive Regulation Of Transcription, Dna Dependent, Nervous System Development, Positive Regulation Of Transcription From Rna Polymerase II Promoter, Regulation Of Transcription, Dna Dependent, Cellular Response To Extracellular Stimulus, Transforming Growth Factor Beta Receptor Signaling Path                     | AGCTGGTGCATACAGAGGAGAAACACGCTTCCCTCGAAGTTCGCGTACAGGAGACCTCACTGCTGTCGTGAAACACACAGGCTGTGGCC       | FBJ osteosarcoma oncogene                                                                |
| Fxyd2    | NM_052823.2    | Atp1g1                                                                                                                                            | Membrane, Microsome, Integral To Membrane, Basolateral Plasma Membrane, Transport, Sodium Ion Transport, Potassium Ion Transport, Ion Transport, Regulation Of Cell Proliferation, Regulation Of Cell Growth, Ion Channel Activity                                                                                                                                                    | CTTGTGTGGTGGCTCTCACTCACTTCAGAAAGGTCGCGTGTGGGGGGGTGAAGAACATGAGCAGGTCATGTAAGATGACTGTGACAGAGAGCC   | FXyD domain-containing ion transport regulator 2                                         |
| Gnaq     | NM_008139.5    | 1110005L02Rik, 6230401102Rik, AA408290, AW060788, Dsk1, Dsk10, Galphaq, Gq, Gq1                                                                   | Cytoplasm, Membrane Fraction, Protein Complex, Plasma Membrane, G Protein Signaling Coupled To Ip3 Second Messenger, Phospholipase C Activating, Glutamate Signaling Pathway, Signal Transduction, Phospholipase C Activation, Skeletal Development, Behavior, Protein Stabilization, Regulation Of Action Potential, G Protein Signaling Adenylate Cyclase Activat                   | GAATGGGCGCTGAACCTAAGAAAGTGTGGACTATCAAAAGTACCCCTGAGTGTGCGTCAAGCATGTATTTATGACGATCATACTAGGAGGG     | guanine nucleotide binding protein, alpha q polypeptide                                  |
| Gnas     | NM_010309.3    | 553040H020Rik, A830027G11Rik, C130027O20Rik, GP5A, GSP, Galphas, Gnas1, Gnasx, Gas, Nesp, Nesp1, Oesd-Sm1, Oesdsm1, P1, P2, P3, P4P1A, P4P1B, P4H | Extracellular Region, Intrinsic To Membrane, Membrane, Cytoplasm, Vesicle, Cytoplasmic Vesicle, Lipid Raft, Cell Projection, Ruffle, Endosome, Membrane Fraction, Plasma Membrane, Energy Reserve, Metabolic Process, Signal Transduction, Skeletal Development, Behavior, Sensory Perception Of Chemical Stimulus, G Protein Signaling Adenylate Cyclase Activ                       | CAGTTCAGATGGACATCACTTGAAGCTGATGAAGCTGGCCAACTTGACTCCCACTGAACTTCTATGAGCATGCCAAGGCTCTGGGGAGATGAGG  | GNAS (guanine nucleotide binding protein, alpha stimulating) complex locus               |
| Gnb1     | NM_008142.3    | AA409223, C77571, Gnb-1                                                                                                                           | G Protein Signaling Coupled To Ip3 Second Messenger, Phospholipase C Activating, Signal Transduction, Sensory Perception Of Taste, Cell Proliferation, G Protein Coupled Receptor Protein Signaling Pathway, G Protein Coupled Receptor Binding, G-protein Activity, G-protein Binding                                                                                                | GGCATACCTCTCTGCGAATAATGTGGCGTGTGGTGGCTGGATAACATCTGCTCCATTAACACCTGAAAACCTGGTGAAGGAAATGCTGGTGTAGT | guanine nucleotide binding protein (G protein), beta 1                                   |
| Gngt1    | NM_010314.2    | Glyt1, Gng1                                                                                                                                       | Membrane, Plasma Membrane, Signal Transduction, Phototransduction, G Protein Coupled Receptor Protein Signaling Pathway, Protein Localization, Opase Activity                                                                                                                                                                                                                         | GAAAGAGATGACACTGGAGAGATGATGGTTCCAATGTTGTGAGAAAGTGAAGATATATTAAGAAAGAGCTGTGAGAAGACCTCTAGTGAAGGGG  | guanine nucleotide binding protein (G protein), gamma transducing activity polypeptide 1 |
| Gpr44    | NM_009621.2    | Ch2, Gpr45, Ptgdr2                                                                                                                                | Membrane, Integral To Membrane, Integral To Plasma Membrane, Plasma Membrane, G Protein Signaling Adenylate Cyclase Inhibiting Pathway, Signal Transduction, Calcium Mediated Signaling, G Protein Coupled Receptor Protein Signaling Pathway, G Protein Coupled Receptor Activity, Receptor Activity                                                                                 | GAAGCGCTCTGCTCACTTGGAGAGATGTCAGCTCCAAACACACAGCACTCTGACCTCCGCTCATCATGACCACTGGTGTGCTGTGGCACGGG    | G protein-coupled receptor 44                                                            |
| Grb2     | NM_008163.3    | AA408164, Ash                                                                                                                                     | Golgi Apparatus, Membrane, Cytoplasm, Nucleus, Endosome, Protein Complex, Plasma Membrane, Vesicle, Membrane, Positive Regulation Of Signal Transduction, Insulin Receptor Signaling Pathway, Regulation Of MapK Cascade, Ras Protein Signaling Transduction, Anatomical Structure Formation, Aging, Dna Damage Response, Signal Transduction, Protein Domain Specific B              | AGGAGCTGTAAGAGACAGAGATGTTTCCCATCTGTAATGGCCGAGAGCTCGAAGCTCAGCTTTTACTTTGTGAGCTGCAACACTGCTTCACT    | growth factor receptor bound protein 2                                                   |
| H2-Ea-ps | NM_010381.2    | A1323765, E-alpha4, H2Ea, H2-Ea, H2Ealpa, Ia-3, Ia3                                                                                               | Transduction, Anatomical Structure Formation, Aging, Dna Damage Response, Signal Transduction, Protein Domain Specific B                                                                                                                                                                                                                                                              | ATCATGAAGGTTTAAAAAACCAATGTTGAGAACCCGCAAGGAGCGCTGTGAGATACCTGGAGGCAATGCCCTCAAGTAAAGTTCAGTGAAGAA   | histocompatibility 2, class II antigen E alpha, pseudogene                               |

## Continue Table S1: Nanostring nCounter SC Mouse Inflammation V2 Panel Gene List

|         |                             |                                                                                           |                                                                                                                                                                                                                                                                                                                                                                          |                                                                                                                                                                             |                                                        |
|---------|-----------------------------|-------------------------------------------------------------------------------------------|--------------------------------------------------------------------------------------------------------------------------------------------------------------------------------------------------------------------------------------------------------------------------------------------------------------------------------------------------------------------------|-----------------------------------------------------------------------------------------------------------------------------------------------------------------------------|--------------------------------------------------------|
| H2-Eb1  | <a href="#">NM_010382.2</a> | H2Eb, H2Eb, Ia-4, Ia4                                                                     | External Side Of Plasma Membrane, Membrane, Integral To Membrane, Lysosomal Membrane, Protein Tetramerization, Immune Response                                                                                                                                                                                                                                           | AAACATGTCTGCTGGCCCACTCCCTCCAGACACTGCTCTCCAGACCTGGCTCTCTGATTCCTCCCTGG<br>GAGATGTGTCTGCTGATGGTGT<br>CTACACACTGAATTTGGTGGCTACTCTCTTTGGTGAAGCCGGGGATTCATTTTCCATCAAGCAGGTTAAAGAT | histocompatibility 2, class II antigen E beta          |
| Hc      | <a href="#">NM_010406.1</a> | C5, C5a, He                                                                               | Extracellular Region, Extracellular Space, Soluble Fraction, Inflammatory Response, Positive Regulation Of Angiogenesis, Innate Immune Response                                                                                                                                                                                                                          | TCACCTGAGCAGGGCGTAGGA                                                                                                                                                       | hemolytic complement                                   |
| Hdac4   | <a href="#">NM_207225.1</a> | 4932408F19Rik, AID47265                                                                   | Sarcomere, Cytoplasm, Nucleus, Cytosol, Histone Deacetylase Complex, Positive Regulation Of Transcription, Dna Dependent, Positive Regulation Of Cell Proliferation, Chromatin Remodeling, Positive Regulation Of Transcription From Rna Polymerase Ii Promoter, Transcription Dna Dependent, Skeletal Development, Negative Regulation Of Transcription Dna Dependent   | ACAGCGTGAAGTCTGGCAGCCCTCAGACGGTGGTATGCCTAGCCAAAGTGGTCCCGCATGGTGTACTGG<br>TGTACTCGGGCTGATGCTGTG                                                                              | histone deacetylase 4                                  |
| Hif1a   | <a href="#">NM_010431.2</a> | AA959795, HIF1alpha, MOP1, hHLH78                                                         | Cytoplasm, Nucleus, Transcription Factor Complex, Nucleolus, Positive Regulation Of Transcription, Dna Dependent, Positive Regulation Of Cell Proliferation, Negative Regulation Of Apoptosis, Positive Regulation Of Transcription From Rna Polymerase Ii Promoter, Signal Transduction, Transcription Dna Dependent, Negative Regulation Of Growth, Epithelial T       | ACCATGATATGTTTAAAGCAGACGTCCACAGCAGCAGTACAGGATGCTGCCAAAAGAGGTGGATATGCTCGG<br>GTTGAACTCAAGCACTGCTCAT                                                                          | hypoxia inducible factor 1, alpha subunit              |
| Hmg1    | <a href="#">NM_010439.3</a> | DEF, HMG-1, Hmg1, SBP-1, amphoterin, p30                                                  | Cell Surface, Extracellular Region, Cytoplasm, Nucleus, Extracellular Space, Condensed Chromosome, Neuron Projection, Nucleolus, Soluble Fraction, Chromosome, Positive Regulation Of Cell Proliferation, Nervous System Development, Neurite Development, Positive Regulation Of Transcription From Rna Polymerase Ii Promoter, Positive Regulation Of Caspase Activity | GTGGACTTATAGGATCAAGCAATCGAACCTGTCTGTGGAAGCAGTGAAGAAAGTCTTATCTATCTTACAG<br>AGGACTCTTCTTAAAGCCGAT                                                                             | high mobility group box 1                              |
| Hmg2    | <a href="#">NM_028252.3</a> | C80539, HMG-2, Hmg2                                                                       | Cytoplasm, Nucleus, Perinuclear Region Of Cytoplasm, Extracellular Space, Condensed Chromosome, Protein Complex, Nucleolus, Soluble Fraction, Chromosome, Positive Regulation Of Transcription, Dna Dependent, Nervous System Development, Positive Regulation Of Transcription From Rna Polymerase Ii Promoter, Negative Regulation Of Transcription Dna Dependent      | ATGTTGGGAACTGTGTAGATGTTGAAAGTATGATACAGGCTGGTGTGGGCGACATCATGCAATCCAG<br>AGTGGAGGTAGAGAGGGCAG                                                                                 | high mobility group box 2                              |
| Hmg1    | <a href="#">NM_028251.3</a> | HMG-14, Hmg14                                                                             | Chromatin, Cytoplasm, Nucleus, Establishment And Or Maintenance Of Chromatin Architecture, Chromatin Binding, Dna Binding                                                                                                                                                                                                                                                | CCCTTGCCTCGCAACTGTGATCTGTGGTCTGAGGAGTCATTTCCTAACADTGTTGATATGCTGTGGAAG<br>ATGGAAGTCTGAGTCTGTG                                                                                | high mobility group nucleosomal binding domain 1       |
| Hras1   | <a href="#">NM_02824.2</a>  |                                                                                           | Golgi Apparatus, Membrane, Microsome, Plasma Membrane, Soluble Fraction, Positive Regulation Of Cell Proliferation, Positive Regulation Of Transcription From Rna Polymerase Ii Promoter, Signal Transduction, Ras Protein Signaling, Transcription, Negative Regulation Of Cell Proliferation, Cell Proliferation Go 0008283, Positive Regulation Of Epithelial Cell    | CAATGTTCCAGTCCCTGTGTGTGTATCTGGGCTCCTGAGTATCATCTGGAGGCTGAGTCAACCTCGGAG<br>CCTGTGGTCATGAACCTAAG                                                                               | Harvey rat sarcoma virus oncogene                      |
| Hsh2d   | <a href="#">NM_197844.1</a> | ALX, Hsh2                                                                                 | Cytoplasm, Mitochondrion, Positive Regulation Of Signal Transduction, T Cell Activation, SH2 Adapter Activity                                                                                                                                                                                                                                                            | CCACCTTTGGCCCTGGGACTGATGAGACTTCTGTATCTGGGTATCTCATCTCTCTTAGTCCCATCTCTGT<br>CCTCAGCCAGAGAACTGT                                                                                | hematopoietic SH2 domain containing                    |
| Hspb1   | <a href="#">NM_013560.2</a> | 27kDa, Hsp25                                                                              | Cell Surface, Contractile Fiber, Cytoplasm, Insoluble Fraction, Proteasome Complex, Nucleus, Cytoskeleton, Plasma Membrane, Soluble Fraction, Negative Regulation Of Apoptosis, Response To Stress, Angiogenesis, Regulation Of I KappaB Kinase Nf KappaB Cascade, Ubiquitin Binding, Protein Kinase Binding                                                             | AGGGCACACTACCGTGGAGGCTCGTGGCCAAAGAGTCAAGCAGTCAAGGGAGATCAACCTCCGTTACTTCC<br>GAGGCCCCGGCCCAATTTGGGG                                                                           | heat shock protein 1                                   |
| Hsp2    | <a href="#">NM_024411.3</a> | 27kDa, 2810021G24Rik, HSP27, MKBP                                                         | Cytoplasm, Nucleus, Soluble Fraction, Response To Heat, Response To Stress                                                                                                                                                                                                                                                                                               | CTGTGTACTCCCTGGTGAATCCAAATCCACCACCCAGGGAGCAGCATCCCTGGGAGTGCATCGGTG<br>CATGTTCAACAGTGTATGTTG                                                                                 | heat shock protein 2                                   |
| It272a  | <a href="#">NM_028903.1</a> | 2310061N23Rik, It27, Ig12, Ig12(b1)                                                       | Response To Virus, Aging                                                                                                                                                                                                                                                                                                                                                 | CTGGGGCAGCTGTTGGAGCTGCTCTGAGCTTGAAGAGTACACCTCTATACAGTCACTCAAGGCTGACAGCA<br>ACCAGGAGATGAAGTTCACAA                                                                            | interferon, alpha-inducible protein 27 like 2A         |
| Irf4    | <a href="#">NM_133871.2</a> | A430056A10Rik, AW261460, MTPAP44, p44                                                     | Cytoplasm                                                                                                                                                                                                                                                                                                                                                                | CTGACAGATACCACTGTGATCCATGAACCAATCACATCAACCACTCCGAACTATACCATCAAGCCACTGCTGAGG<br>ACCAATTCAGTGTGTGTTT                                                                          | interferon-induced protein 44                          |
| Irf1    | <a href="#">NM_008331.2</a> | ISG56, Irf56, P56                                                                         | Cytoplasm, Response To Virus                                                                                                                                                                                                                                                                                                                                             | CAACTGAGCAGTCCGAAACA<br>ACACAGATGAAGTCACTGAGAGCAACTCGGACAGCTAAATGCCATTTCAAGCACTGATAGAGAGA<br>TGACTCTTGATGAGTTGAGG                                                           | interferon-induced protein with tetrapeptide repeats 1 |
| Irf2    | <a href="#">NM_008332.2</a> | AV302338, Irf54, P54                                                                      | Response To Virus                                                                                                                                                                                                                                                                                                                                                        | ATGAACTCAACAGCAGACTGTTCTGAAGCAGACTAGAGGAAAGCAAGAGAAAGTACGCTGGGAGA<br>TGCTCTCACTGCTCTCAGTTGA                                                                                 | interferon-induced protein with tetrapeptide repeats 2 |
| Irfb1   | <a href="#">NM_010510.1</a> | IFN-beta, IFNB, Irb                                                                       | Extracellular Region, Extracellular Space, Response To Virus, Positive Regulation Of Transcription From Rna Polymerase Ii Promoter, Defense Response, Defense Response To Virus, Defense Response To Bacterium, Humoral Immune Response, Caspase Activation, Hematopoietin Interferon Class200 Domain Cytokine Receptor Binding, Transcription Repressor Act             | GATGAATCAACAGCAGACTGTTCTGAAGCAGACTAGAGGAAAGCAAGAGAAAGTACGCTGGGAGA<br>TGCTCTCACTGCTCTCAGTTGA                                                                                 | interferon beta 1, fibroblast                          |
| Irfg    | <a href="#">NM_008337.1</a> | IFN-gamma, Irfg                                                                           | Extracellular Region, Extracellular Space, Response To Virus, Positive Regulation Of Transcription, Dna Dependent, Positive Regulation Of Transcription From Rna Polymerase Ii Promoter, Regulation Of Growth, Positive Regulation Of T Cell Proliferation, Defense Response To Virus, Immune Response, Unfolded Protein Response                                        | CTAGCTCTGAGCAATGAAGCTCACACTGACTGCTTGTGCTGAGCTCTCTCATGCTGTCTTCTGGCTTACTG<br>CCAGGCACTGCTTGAAG                                                                                | interferon gamma                                       |
| Irgp1   | <a href="#">NM_021792.3</a> | 2900074L10Rik, AID46432, AW111922, Irgp1, Irgp, Irgp3                                     | Golgi Apparatus, Membrane, Cytoplasm, Endoplasmic Reticulum, Endoplasmic Reticulum, Nucleus, Cytokine And Chemokine Mediated Signaling Pathway, Innate Immune Response, Hydrolase Activity Acting On Acid Anhydrides, Glp Binding, Nucleotide Binding, Identical Protein Binding, Gtpase Activity                                                                        | GGCAAAAAGGGGATGCTTCCGAGTTAAAGAGTGGCCAGTGGTGAAGAATAGTCTCTCTCAAAGACCA<br>GGATTTAATCCGCAAGCAACCACA                                                                             | interferon inducible GTPase 1                          |
| Irf10   | <a href="#">NM_010548.1</a> | CSIF, Irf10, 6629401D04Rik, AID529744, CRF2-4, Ctrb4, D16H21556, D21S58b, Irf10R2, Irf102 | Extracellular Region, Extracellular Space, Positive Regulation Of Transcription, Dna Dependent, Negative Regulation Of Apoptosis, Positive Regulation Of Transcription From Rna Polymerase Ii Promoter, Inflammatory Response, Regulation Of Gene Expression, Positive Regulation Of Cytokine Secretion, Immune Response, Positive Regulation Of Transcription F         | GGGCCCTTGTCTGTTGCTCTTCAATGTCTCTCATCCCTGAGTTCAGAGCTCTCAAGAGAGTGTGAAGAACCTCA<br>CTTTACCTGGTCTCAGCCCAAAATGGAATGAGCTGAGAGCTGAGCACTGAAGAACTTATGACTCAT                            | interleukin 10                                         |
| Irf10b  | <a href="#">NM_008349.5</a> |                                                                                           | Receptor Activity                                                                                                                                                                                                                                                                                                                                                        | GGGCTTACAGATGCATACTG                                                                                                                                                        | interleukin 10 receptor, beta                          |
| Irf11   | <a href="#">NM_008350.2</a> | IL-11                                                                                     | Extracellular Region, Cytoplasm, Extracellular Space, Positive Regulation Of Cell Proliferation, Positive Regulation Of Mapkkin Cascade, Positive Regulation Of Peptidyl Tyrosine Phosphorylation, Cytokine Activity, Growth Factor Activity                                                                                                                             | GCGCTGGACATGGGATTTGACGCTCTGCTGTGTCAGCAAGGCTGAGTAGACTGATGCTCTCACTCCGG<br>CATGTACAAAGCTGGGGCTG                                                                                | interleukin 11                                         |
| Irf12a  | <a href="#">NM_008351.1</a> | IL-12p35, Irf12a, L12a, p35                                                               | Extracellular Region, Cytoplasm, Extracellular Space, Positive Regulation Of Cell Proliferation, Immune Response, Positive Regulation Of Cell Adhesion, Cell Cycle Arrest Go 0007050, Cell Migration, Protein Heterodimerization Activity, Cytokine Activity, Growth Factor Activity                                                                                     | TCATGAAGACTCAACGGGCAACCAACAGCAGTGAAGACTGTTACCAGTGAAGTCAACCAAGAGGAGTGT<br>GCTGCTGACTAGAGACTCT                                                                                | interleukin 12a                                        |
| Irf12b  | <a href="#">NM_008352.1</a> | IL-12b, IL-12p40, Irf12p40, p40                                                           | Extracellular Region, Membrane, Cytoplasm, Extracellular Space, Cell Surface Receptor Linked Signal Transduction Go 0007166, Positive Regulation Of T Cell Proliferation, Defense Response To Virus, Cytokine And Chemokine Mediated Signaling Pathway, Positive Regulation Of Cell Adhesion, Cell Cycle Arrest Go 0007050, Cell Migration, Hematopoietin Interf         | TGTTAGAGAGACTCAACGAGTCAATGCAAGGGGGAAATGCTGGTCAAGCTCAGATGCTGATACAAAT<br>TCTCTGTCAGCAAGTGGGCTG                                                                                | interleukin 12b                                        |
| Irf13   | <a href="#">NM_008355.2</a> | Irf13                                                                                     | Extracellular Region, Extracellular Space, Immune Response, Positive Regulation Of Protein Secretion, Hematopoietin Interferon Class200 Domain Cytokine Receptor Binding, Cytokine Activity                                                                                                                                                                              | AGCTACAACAAAGCACTGTTGGCCAGCGCCCTCTAATGAGGAGAGACATCCCTGGCATCTCAGCTGTGACT<br>GTTCTCTCTCACTCAGACT                                                                              | interleukin 13                                         |
| Irf15   | <a href="#">NM_008357.1</a> | AID53618, Irf15                                                                           | Extracellular Region, Cytoplasm, Extracellular Space, Positive Regulation Of Cell Proliferation, Positive Regulation Of Immune Response, Positive Regulation Of T Cell Proliferation, Immune Response, Hematopoietin Interferon Class200 Domain Cytokine Receptor Binding, Cytokine Activity                                                                             | GTTGTTGAGAGGCTGAGTTCCACTCAACGCTCAGAGAGGTCAGGAAGAATCCACTTGACATGGCCCTCTG<br>GCTCTCAAAGCACTGCTCTCT                                                                             | interleukin 15                                         |
| Irf17a  | <a href="#">NM_010552.3</a> | Ctla-8, Ctla8, IL-17, IL-17A, Irf17                                                       | External Side Of Plasma Membrane, Extracellular Region, Extracellular Space, Positive Regulation Of Transcription From Rna Polymerase Ii Promoter, Inflammatory Response, Cytokine Activity                                                                                                                                                                              | ACCTCAAGTCTTAACTCCCTGGGCAAAAGTGAAGTCAAGAGCCCTCAGACTCACTCAACCGTCCAGCTCAC<br>CTGACTCTCCACCGCAATGA                                                                             | interleukin 17A                                        |
| Irf18   | <a href="#">NM_008360.1</a> | Igf1, Irf18                                                                               | Extracellular Region, Cytoplasm, Extracellular Space, Apical Plasma Membrane, Regulation Of Cell Adhesion, Inflammatory Response, Immune Response, Angiogenesis, Mapkkin Cascade Go 000165, Interferon Gamma Biosynthetic Process, Response To Hypoxia, Cytokine Activity                                                                                                | CCAGCATCAGGCAAAAGAGCGCCCTCAACCTCCAACTCACTCTCTGGCCAGGAACTGGCTGCATGTC<br>AGAAGACTCTGGTCACTTC                                                                                  | interleukin 18                                         |
| Irf18ap | <a href="#">NM_010553.2</a> | AcPL, IL-18Rbeta, IL-18RacP, IL-18Rbeta, IL-18acPL                                        | Intrinsic To Membrane, Membrane, Integral To Membrane, Signal Transduction, Cytokine And Chemokine Mediated Signaling Pathway, Innate Immune Response, Receptor Activity, Transmembrane Receptor Activity                                                                                                                                                                | CTTGAAGTGGTCCAGCGAGTCCAGGTTCTGAGCCAAATCGTTACCACATGCTGTGAGAACTCCAAAGGTT<br>TATGTTCAAGGGCTCAAT                                                                                | interleukin 18 receptor accessory protein              |
| Irf1b   | <a href="#">NM_008361.3</a> | IL-1beta, Irf1b                                                                           | Extracellular Region, Vesicle, Secretory Granule, Extracellular Space, Positive Regulation Of Transcription From Rna Polymerase Ii Promoter, Activation Of Mapk Activity, Activation Of Nf KappaB Transcription Factor, Positive Regulation Of I KappaB Kinase Nf KappaB Cascade, Positive Regulation Of T Cell Proliferation, Inflammatory Response, Response           | GTTGATCAAGGGCAATAGGACGACTCTCTAGACAGAACTAGCTGTCAAGGTGGGGATGAAATGGTCA<br>AGCCGCACTGAGGCTTTCAT                                                                                 | interleukin 1 beta                                     |

Continue Table S1: Nanostring nCounter SC Mouse Inflammation V2 Panel Gene List

|        |                                |                                                                                                                        |                                                                                                                                                                                                                                                                                                                                                                       |                                                                                                 |                                       |
|--------|--------------------------------|------------------------------------------------------------------------------------------------------------------------|-----------------------------------------------------------------------------------------------------------------------------------------------------------------------------------------------------------------------------------------------------------------------------------------------------------------------------------------------------------------------|-------------------------------------------------------------------------------------------------|---------------------------------------|
| Il1r1  | <a href="#">NM_001233382.1</a> | CD121a, CD121b, IL-1R, IL-1R1                                                                                          | Cell Surface, Extracellular Region, Intrinsic To Membrane, Membrane, Integral To Membrane, Protein Complex, Plasma Membrane, Signal Transduction, Cytokine And Chemokine Mediated Signaling Pathway, Innate Immune Response, Receptor Activity, Transmembrane Receptor Activity                                                                                       | CTCTCGGATAAAGATAAATGTTGGTGAAGAAATGGCTGAGACACAGAGGGGATATATATGCGGTATGTCCATACCTCCGGGGGAGCA         | interleukin 1 receptor, type 1        |
| Il1rn  | <a href="#">NM_031167.4</a>    | FK30041P17Rk, IL-1ra                                                                                                   | Extracellular Region, Cytoplasm, Vesicle, Nucleus, Extracellular Space, Centrosome, Negative Regulation Of Apoptosis, Lipid Metabolic Process, Positive Regulation Of Jnk Activity, Receptor Activity                                                                                                                                                                 | ACACTGAAATGTCACCTTTGTTAGTGAACATGACGCCAGCTAAGTCTGGAAACACAAAGGGGGCGGGA GATTTTCTTTATCTATGCTAGT     | interleukin 1 receptor antagonist     |
| Il2    | <a href="#">NM_008366.3</a>    | Il-2                                                                                                                   | Extracellular Region, Extracellular Space, Positive Regulation Of Transcription From Rna Polymerase II Promoter, Positive Regulation Of T Cell Proliferation, Immune Response, G Protein Coupled Receptor Protein Signaling Pathway, Positive Regulation Of Protein Amino Acid Phosphorylation, Carbohydrate Binding, Cytokine Activity, Growth Factor Activity       | TTCCAGTCCGTAAGAAATGTCAGCTCGCGGATGCTGCTGAGTTCACCAAGAAAGCTTCAATGGA AGATGTCAGAAATTCATCAGC          | interleukin 2                         |
| Il21   | <a href="#">NM_021782.2</a>    |                                                                                                                        | Extracellular Region, Extracellular Space, Positive Regulation Of T Cell Proliferation, Immune Response, Cell Maturation, Hematopoietin Interferon Class200 Domain, Cytokine Receptor Binding, Cytokine Activity                                                                                                                                                      | ATGGCCTGGGGATGGTTTGTACTAAGAAAAAGTGTCTGACCTCAGTGCCCTTAAACACAGCAGATCCCG GTGTACCCDCCATAGATAGACCA   | interleukin 21                        |
| Il2ra2 | <a href="#">NM_178258.5</a>    | CRF2-10, CRF2-e1, CRF2X, Il-22bp                                                                                       | Extracellular Region, Cytozol, Cytokine And Chemokine Mediated Signaling Pathway, Receptor Activity                                                                                                                                                                                                                                                                   | TAGCATTCGCTTAGGTTCTCTCATCTACTCTTGAGGATGCAACAGAAATACACCACCTGTGTATCTCGAGG CCCCAGAGTCCGATTCAGC     | interleukin 22 receptor, alpha 2      |
| Il23a  | <a href="#">NM_031252.1</a>    | IL-23, p19                                                                                                             | Extracellular Region, Extracellular Space, Response To Virus, Positive Regulation Of Transcription From Rna Polymerase II Promoter, T Cell Proliferation, Positive Regulation Of T Cell Proliferation, Inflammatory Response, Immune Response, Innate Immune Response, Tissue Remodeling, Cytokine Activity                                                           | CAAGGACAAAGCCAGTCTGCTCCAAAGATCCGCCAGCTGTGGCTTTTATAGCACTGCTGACTGTGACAT CTTCAAAGGGAGGCTGCTCTA     | interleukin 23, alpha subunit p19     |
| Il23r  | <a href="#">NM_144548.1</a>    | IL-23R                                                                                                                 | Membrane, Integral To Membrane, Integral To Plasma Membrane, Plasma Membrane, Jak Stat Cascade, Inflammatory Response, Cytokine And Chemokine Mediated Signaling Pathway, Innate Immune Response, Receptor Activity                                                                                                                                                   | AAGTATTTGGTGGTCCAGCTGCTCAATCCCTAGGATGGAAGCAACCACTCAACGCTCATGATGAT ATAGTGATACCTTGGCTCCA          | interleukin 23 receptor               |
| Il3    | <a href="#">NM_010558.4</a>    | BPA, Cdmu, HCGF, p13, MCGF, PSF                                                                                        | Extracellular Region, Extracellular Space, Positive Regulation Of Cell Proliferation, Negative Regulation Of Apoptosis, Hemopoiesis, Regulation Of Gene Expression, Immune Response, Cytokine And Chemokine Mediated Signaling Pathway, Response To Hormone Stimulus, Positive Regulation Of Protein Amino Acid Phosphorylation, Regulation Of Apoptosis, Response    | TGCGCTTATTGTCAGGAGATATAGGGAAGCTCCCAAGCTGAACCTCAAACTGATGATGAAGCCCTCTCG AGGAATAAGGCTTGGGAGAG      | interleukin 3                         |
| Il4    | <a href="#">NM_021283.1</a>    | BSF-1, Il-4                                                                                                            | External Side Of Plasma Membrane, Extracellular Region, Extracellular Space, Positive Regulation Of Transcription, Positive Regulation Of Cell Proliferation, Negative Regulation Of Apoptosis, Positive Regulation Of Transcription From Rna Polymerase II Promoter, Negative Regulation Of Transcription Dna Dependent, Regulation Of Phosphor                      | TGCTGAAGAAAGACTGATGTTCTGATGAGCTGACAGAGACTTTGGGGCTTTGGATGCCGTGATCATGGTA AGCTCCACATGAATGATCCA     | interleukin 4                         |
| Il5    | <a href="#">NM_010558.1</a>    | Il-5                                                                                                                   | Extracellular Region, Extracellular Space, Soluble Fraction, Positive Regulation Of Transcription, Positive Regulation Of Cell Proliferation, Immune Response, Positive Regulation Of Transcription Factor Activity, Cytokine And Chemokine Mediated Signaling Pathway, Positive Regulation Of Peptidyl Tyrosine Phosphorylation, Cytokine Activity                   | CAATGAGAGATGAGGCTCTGCTCCCTACTCAAAAATCCACCACTGATGATGGAAATCTTCAGGGGCTAGA CATACTAGAGATCAAACTGTC    | interleukin 5                         |
| Il6    | <a href="#">NM_031168.1</a>    | Il-6                                                                                                                   | External Side Of Plasma Membrane, Extracellular Region, Extracellular Space, Positive Regulation Of Transcription, Positive Regulation Of Transcription, Positive Regulation Of Cell Proliferation, Negative Regulation Of Apoptosis, Neurite Development, Positive Regulation Of Transcription From Rna Polymerase II Promoter, Positive Regulation                  | CTCTCTCAAGAGACTCCATCCAGTTCCTTGGGACTGATCGTGGTGAACCAAGGCGCTTCCCTACTCCAAAT ATCCGAGAGAGACTCAGAG     | interleukin 6                         |
| Il6ra  | <a href="#">NM_010559.2</a>    | CD126, IL-6R, Il6r                                                                                                     | Cell Surface, Extracellular Region, Membrane, Integral To Membrane, Extracellular Space, Apical Plasma Membrane, Positive Regulation Of Cell Proliferation, Cytokine And Chemokine Mediated Signaling Pathway, Positive Regulation Of Mapkk Homodimerization Activity, Receptor Activity                                                                              | CACTCTCAAGAGACTCCATCCAGTTCCTTGGGACTGATCGTGGTGAACCAAGGCGCTTCCCTACTCCAAAT ATCCGAGAGAGACTCAGAG     | interleukin 6 receptor, alpha         |
| Il7    | <a href="#">NM_008371.2</a>    | A630026I06Rk, Il-7, Ilb368                                                                                             | Extracellular Region, Extracellular Space, Negative Regulation Of Apoptosis, Regulation Of Gene Expression, Immune Response, Anti Apoptosis, Negative Regulation Of Catalytic Activity, Hematopoietin Interferon Class200 Domain, Cytokine Receptor Binding, Cytokine Activity, Growth Factor Activity                                                                | AAACATTCATGGTGAACCACTGGGGAGTGAAGCTCTCTTTAGACTGGAGACTGAGAGGGCTCACGGGTGAT GGATAGCTCTGAAACACAGA    | interleukin 7                         |
| Il9    | <a href="#">NM_008373.1</a>    | Il-9, P40                                                                                                              | Extracellular Region, Extracellular Space, Soluble Fraction, Immune Response, Hematopoietin Interferon Class200 Domain, Cytokine Receptor Binding, Cytokine Activity, Growth Factor Activity                                                                                                                                                                          | TCTGTTTGGCTTCAAGTCTGCTGGGCGCAGAGATGACGACCACTGGGGCTGACAGACCAATACCTTATT GAAATCTGAAGATGATCCAC      | interleukin 9                         |
| Ilf1   | <a href="#">NM_008390.1</a>    | AU020929, Ilf-1                                                                                                        | Nucleus, Positive Regulation Of Transcription, Dna Dependent, Positive Regulation Of T Cell Proliferation, Kinase Nf Kappab Cascade, Positive Regulation Of Cytokine Secretion, Response To Bacterium, Regulation Of Transcription, Negative Regulation Of Transcription From Rna Polymerase II Promoter, Positive Regulation Of Transcription, Identical Pr          | TGTTCCGAGTGGGGCCATCCACAGCGCCATACAAAGCAGGAAAGAAAGAGCCAGATCCCAAGCATGGAGGCG AAACCTCCGTTGGCCATGAATC | interleukin regulatory factor 1       |
| Ilf3   | <a href="#">NM_016849.3</a>    | C920001K05Rk, Ilf-3                                                                                                    | Nucleus, Transcription Dna Dependent, Regulation Of Transcription, Dna Dependent, Transcription Factor Activity, Dna Binding                                                                                                                                                                                                                                          | GCTGCTACCAAAAGAGTATTGCGGCGCATCATCTGCTGCTGACTGGCTGAGTGGTGTATTCTTCAACAGG CTGAGTCTCCCATCTGAGCT     | interleukin regulatory factor 3       |
| Ilf5   | <a href="#">NM_012057.3</a>    | AW491843, Ilf5                                                                                                         | Nucleus, Transcription Dna Dependent, Regulation Of Transcription, Dna Dependent, Transcription Factor Activity, Dna Binding                                                                                                                                                                                                                                          | CTTTATGACCCAGGATCCAAATACCCAGGGTAGCCCACTTTAGAGTTCGCCCAATCTTCTAGCAAACTGCCCA AGGAGTGTGGGGGCTTCC    | interleukin regulatory factor 5       |
| Ilf7   | <a href="#">NM_016850.2</a>    |                                                                                                                        | Nucleus, Cytoplasm, Nuclear Chromatin, Transcription Factor Complex, Positive Regulation Of Transcription, Dna Dependent, Positive Regulation Of Cell Proliferation, Negative Regulation Of Apoptosis, Positive Regulation Of Transcription From Rna Polymerase II Promoter, Transcription Dna Dependent, Negative Regulation Of Transcription, Dna Dependent, Negat  | CGCTGTGCACTCCACAGCAGCGGTTTTATCTGCGCCAGCAATCAGGGATGATCCATGATCCCATAGGTT GTAGCCATGAGCGGAGGCTGG     | interleukin regulatory factor 7       |
| Ilfb2  | <a href="#">NM_008404.4</a>    | 2E6, A1528527, C618, LAD, LCAMB, Lfa1, MF17                                                                            | Cell Surface, Membrane, Integral To Membrane, Lipid Raft, Membrane Fraction, Integrin Complex, Regulation Of Peptidyl Tyrosine Phosphorylation, Activation Of Nf Kappab Transcription Factor, Multicellular Organismal Development, Cell Cell Adhesion, Cell Matrix Adhesion, Positive Regulation Of Angiogenesis, Endothelial Cell Migration, Protein Complex Bin    | GCTCGTTCCTTCCGCGATATATCAAGTCTGCGAGGTTTTGACGGAGTCTGCTCGAGCTGCCAATCTTCCGCG AGAGCCCTAAGAAATTCGCG   | integrin beta 2                       |
| Jun    | <a href="#">NM_010591.2</a>    | AP-1, Junc, c-jun                                                                                                      | Nucleus, Cytoplasm, Nuclear Chromatin, Transcription Factor Complex, Positive Regulation Of Transcription, Dna Dependent, Positive Regulation Of Cell Proliferation, Negative Regulation Of Apoptosis, Positive Regulation Of Transcription From Rna Polymerase II Promoter, Transcription Dna Dependent, Negative Regulation Of Transcription, Dna Dependent, Negat  | CGCGACAGAAAGTGGACTTTTGGTAACTGACCAAGAACTGATGCACTTAACATTCAGTATTAA AGGGGGGGGGGGGTTACA              | jun proto-oncogene                    |
| Kaap1  | <a href="#">NM_016679.4</a>    | INRF2, mKIA0132                                                                                                        | Cytoplasm, Endoplasmic Reticulum, Nucleus, Focal Adhesion, Centrosome, Transcription Dna Dependent, Regulation Of Transcription, Dna Dependent                                                                                                                                                                                                                        | TCTATTGCTGCTTGGCATGATCTGCTGACAGAGGCTCTGCTTCTGGGACACACAGTGTCTGTGCA GTTTCAGGGCATGAAAGCCA          | kelch-like ECH-associated protein 1   |
| Kng1   | <a href="#">NM_023125.3</a>    | Kng                                                                                                                    | Extracellular Region, Microsome, Extracellular Space, Blood Coagulation, Inflammatory Response, Negative Regulation Of Cell Adhesion, Negative Regulation Of Map Kinase Activity, Positive Regulation Of Mapkk Cascade, Protease Inhibitor Activity, Receptor Binding                                                                                                 | ACTTGATTTTACAGTGTCTCTTCAACCCATCCCTGACATGAGGGAATGGAGGCTCTCTAAAGCTGATGTT GCCACAGACGCTTATGATCT     | kininogen 1                           |
| Link1  | <a href="#">NM_010717.2</a>    |                                                                                                                        | Golgi Apparatus, Cytoplasm, Nucleus, Perinuclear Region Of Cytoplasm, Focal Adhesion, Neuron Projection, Protein Amino Acid Phosphorylation, Phosphorylation, Nucleotide Binding, Zinc Ion Binding, Protein Kinase Activity, Kinase Activity, Protein Serine Threonine Kinase Activity, Protein Heterodimerization Activity, Transferrase Activity, Transferring Phos | CCACAAGTCTGCTGGCTGGAGAAAGGAGGAGTGGTGGGCCCATCTTGGCTGGCTGGACATGATCGATGAAA AGAATCAGCTGAAGACTTACGG  | LIM-domain containing, protein kinase |
| Lta    | <a href="#">NM_010735.1</a>    | LT, LT- $\beta$ , LT- $\alpha$ , LT $\beta$ , LT $\alpha$ , Lta, TNF- $\beta$ , TNFSF1, Tnb, Tnf $\beta$ , Ilb, Ilb382 | Extracellular Region, Membrane, Extracellular Space, Positive Regulation Of Cell Proliferation, Inflammatory Response, Immune Response, Cell Proliferation, Go                                                                                                                                                                                                        | AAAGCGGAAATGAAAGCCCTCAGTACAACTAGTCCACAGCAAGGTGTCTCACTCAGCAGAGCCCT ATCTAGAGAGAGATGGGAGAGA        | lymphotoxin A                         |
| Ltb    | <a href="#">NM_008518.2</a>    | A1662801, LTbeta, Tnf $\alpha$ , Tnf $\beta$ , p33                                                                     | Membrane, Integral To Membrane, Extracellular Space, Plasma Membrane, Immune Response, Cytokine Activity                                                                                                                                                                                                                                                              | ATCAGAGCGTGGTGGAGAGATCATTTGGCTCAGGACAGGCTCAGAAAGAGCTGATGACGAAACCCCTG GTGCACTTCCCTCCACCTCTAG     | lymphotoxin B                         |
| Ltb4r1 | <a href="#">NM_008519.2</a>    | BLT1, BLTR, Ltb4r, mBLTR                                                                                               | Membrane, Integral To Membrane, Plasma Membrane, Signal Transduction, G Protein Coupled Receptor Protein Signaling Pathway, G Protein Coupled Receptor Activity, Receptor Activity                                                                                                                                                                                    | AAACCCCTGCTTTTGGCTGCAACAGCTACATCTCTGAGAGCACTTCTCTGCTGGTGGATGCTCCCTGCTGTG TTGGCATTTGCTACTGCTCT   | leukotriene B4 receptor 1             |
| Ltb4r2 | <a href="#">NM_020490.2</a>    | S830462007Rk, BLT2, LTB4-R2, LTB4-R2, LTB4-R2                                                                          | Membrane, Integral To Membrane, Membrane Fraction, Plasma Membrane, Signal Transduction, G Protein Coupled Receptor Protein Signaling Pathway, G Protein Coupled Receptor Activity, Receptor Activity                                                                                                                                                                 | GCACAGGGTGGGTGCTGGTGGCCGATGCTGCTGGCTTGGCTGCTGGCTGGCTTCCACACCGGCTAAT CTCTACAGGGGGTGGCCCGCT       | leukotriene B4 receptor 2             |
| Ly96   | <a href="#">NM_016823.1</a>    | ESOP-1, MD2, MD2                                                                                                       | Extracellular Region, Inflammatory Response, Innate Immune Response                                                                                                                                                                                                                                                                                                   | GAGCTCTAAAGAGAGAGATGTGAATACCAATACCATCTCTTGGGAGGATACTTCTTAAGGGCCATTACA GATGTGTGCAAGACTTATCC      | myophycine antigen 96                 |

## Continue Table S1: Nanostring nCounter SC Mouse Inflammation V2 Panel Gene List

|          |                                |                                                                                  |                                                                                                                                                                                                                                                                                                                                                                                                                                                                                                                                                                                                       |                                                                                                     |                                                                          |
|----------|--------------------------------|----------------------------------------------------------------------------------|-------------------------------------------------------------------------------------------------------------------------------------------------------------------------------------------------------------------------------------------------------------------------------------------------------------------------------------------------------------------------------------------------------------------------------------------------------------------------------------------------------------------------------------------------------------------------------------------------------|-----------------------------------------------------------------------------------------------------|--------------------------------------------------------------------------|
| Maf      | <a href="#">NM_010755.3</a>    |                                                                                  | Nucleus,Transcription Dna Dependent,Regulation Of Transcription,Dependent,Sequence Specific Dna Binding,Transcription Factor Activity,Dna Binding                                                                                                                                                                                                                                                                                                                                                                                                                                                     | TGGGGAGGGCAACTTGGCTAAGTGGGGGGGGGGGAGCGGCTTAGGTTCTAAGTTCCCTGGGCTGAAAGCTGG<br>GCTCAATGAAATGAGGCTGTG   | v-maf musculoaponeurotic fibrosarcoma oncogene family, protein F (avian) |
| Mafg     | <a href="#">XM_001002362.1</a> | AA545192, C630022N07Rk                                                           | Nucleus,Regulation Of Cellular Ph,Transcription Dna Dependent,Regulation Of Transcription,Dependent,Regulation Of Cell Proliferation,Sequence Specific Dna Binding,Transcription Factor Activity,Dna Binding                                                                                                                                                                                                                                                                                                                                                                                          | AAGATGTCTCTGGGAAGGCTTTAGAAAGCTGAAATGAGGTTGAGCCGGAGGGGGGGCTGACTGAGGAGGGAC<br>CTGTTTGGCTTTGTTCCCTGGCC | v-maf musculoaponeurotic fibrosarcoma oncogene family, protein G (avian) |
| Mafk     | <a href="#">NM_010757.2</a>    | AW061068, NF-E2, Nfe2u                                                           | Nucleus,Nervous System Development,Transcription Dna Dependent,Regulation Of Transcription,Dependent,Sequence Specific Dna Binding,Transcription Factor Activity,Dna Binding                                                                                                                                                                                                                                                                                                                                                                                                                          | GGGTAGACACCATTGCTGCTCCCTTCTGGGCTGGCCGCTCTGCTCTTCAAGGCGCTCAACCTGCTTAG<br>CTCTAGAGCCAGGCTCATGT        | v-maf musculoaponeurotic fibrosarcoma oncogene family, protein K (avian) |
| Map2k1   | <a href="#">NM_008927.3</a>    | MAPKK1, MEKK1, Mek1, Prkml1                                                      | Cdcp1 Apparatus,Cytoplasm,Nucleus,Cytosol,Cytoskeleton,Perinuclear Region Of Cytoplasm,Cell Cortex,Microtubule,Dendrite,Plasma Membrane,Soluble Fraction,Positive Regulation Of Cell Differentiation,Activation Of Mapk Activity,Response To Oxidative Stress,Keratinocyte Differentiation,Negative Regulation Of Cell Proliferation,Cell Proliferation                                                                                                                                                                                                                                               | CTTTGTGCTGGGGCTATTGTCGTCTATCAAAACACTGCCAGCTGAACACAGTAAACCTAGTGAACCTGGTG<br>GTGCTTCTTACTGATGTTGCA    | mitogen-activated protein kinase kinase 1                                |
| Map2k4   | <a href="#">NM_009157.4</a>    | JNKK1, MEK4, MKK4, PRKMK4, Sek1, Serk1                                           | Cytoplasm,Nucleus,Cytosol,Activation Of Jnk Activity,Jnk Cascade,Response To Stress,MapkK Cascade Go 0000165,Protein Amino Acid Phosphorylation,Phosphorylation,Positive Regulation Of Protein Amino Acid Phosphorylation,Apoptosis Go,Nucleotide Binding,Protein Kinase Activity,Kinase Activity,Protein Serine Threonine Kinase Activity,Protein T                                                                                                                                                                                                                                                  | CTGCCAGACACCATGTCGAATAGACTGGTGTGTTCCATCATGTGTATCTCTGCTAGCTAGCTGTGCAT<br>CCCTGTAATACCTGACTGATC       | mitogen-activated protein kinase kinase 4                                |
| Map2k6   | <a href="#">NM_011943.2</a>    | MEK6, MKK6, Prkm6, SAPKK3                                                        | Cytoplasm,Nucleus,Cytoskeleton,Transcription Dna Dependent,Activation Of Mapk Activity,Response To Stress,Regulation Of Transcription,Dependent,MapkK Cascade Go 0000165,Protein Amino Acid Phosphorylation,Phosphorylation,Apoptosis Go,Nucleotide Binding,Protein Kinase Activity,Kinase Activity,Protein Serine Threonine Kinase Activity,Prot                                                                                                                                                                                                                                                     | GGGCTTAAGTCCAAAGAGGGTTGAACAGCTGAGCCAGTCCACCOCGGCTGGGATTTAGACTCCAGG<br>GCTGATGATCTATTGGAACACAG       | mitogen-activated protein kinase kinase 6                                |
| Map3k1   | <a href="#">NM_011945.2</a>    | MAPKKK1, MEKK1, Mekk                                                             | Cytoplasm,Cytoskeleton,Membrane Fraction,Protein Polyubiquitination,Protein Oligomerization,Positive Regulation Of Transcription From Rna Polymerase II Promoter,Activation Of Jnk Activity,Regulation Of Cell Migration,Protein Amino Acid Autophosphorylation,Jnk Cascade,Positive Regulation Of Map Kinase Activity,Apoptotic Mitochondrial Change                                                                                                                                                                                                                                                 | CAGCAGATCCCTCCGCTTCAAAAGATTGGCCGAGCCATGATTCAGGTTGGTGAAGCACTGGTGGCTCTTA<br>TTCTAGAAAACCTGAGCTAA      | mitogen-activated protein kinase kinase kinase 1                         |
| Map3k5   | <a href="#">NM_008580.4</a>    | 7420452D20Rk, ASK, ASK1, MAPKKK5, MekK5                                          | Cytoplasm,Endoplasmic Reticulum,Activation Of Mapk Activity,Jnk Cascade,Positive Regulation Of Caspase Activity,Response To Stress,MapkK Cascade Go 0000165,Protein Amino Acid Phosphorylation,Innate Immune Response,Phosphorylation,Apoptosis Go,Caspase Activation,Nucleotide Binding,Protein Homodimerization Activity,Protein Kinase Activity,K                                                                                                                                                                                                                                                  | CATCATCTCTACTGGGATTAATTCGATCTCACTCCACTCCCTGAAGAAATTTTGGCAGAGAATCTGTGTC<br>ACGGGAACTACACTGATC        | mitogen-activated protein kinase kinase kinase 5                         |
| Map3k7   | <a href="#">NM_172688.2</a>    | B430101B05, C87327, Tak1                                                         | Membrane,Cytoplasm,Plasma Membrane,Soluble Fraction,Negative Regulation Of Apoptosis,Signal Transduction,Transcription Dna Dependent,Activation Of Mapk Activity,Jnk Cascade,Positive Regulation Of I Kappab Kinase Nf Kappab Cascade,Response To Stress,Angiogenesis,Regulation Of Transcription,Dependent,Transforming Growth Factor Beta Recept                                                                                                                                                                                                                                                    | CAATACTAAGTGTCCCACTGACTATTAAAGGTAGTGGTGGCACTGCTGTAAGAGCAAGTACTACTGA<br>CTTTCGATGATCTATTGATGCTG      | mitogen-activated protein kinase kinase kinase 7                         |
| Map3k9   | <a href="#">NM_177395.2</a>    | E130314H24Rk, Mk1, Prke1                                                         | Transcription Dna Dependent,Protein Amino Acid Autophosphorylation,Response To Stress,Regulation Of Transcription,Dependent,Protein Amino Acid Phosphorylation,Phosphorylation,Apoptosis Go,Nucleotide Binding,Protein Kinase Activity,Kinase Activity,Protein Serine Threonine Kinase Activity,Protein Tyrosine Kinase Activity,Transferase Actv                                                                                                                                                                                                                                                     | AATGCCCTTAGGCAACAGTGCTTAGTGTGCTGATCTCACTGTAGCTGGAGGCTGGGAAACATTTCT<br>TGATCTCTGTTTTTCAATGCG         | mitogen-activated protein kinase kinase kinase 9                         |
| Mapk14   | <a href="#">NM_011951.2</a>    | CSBP2, Cxk1, Cxlp1, Mx2, PRKM14, PRKM15, p38, p38-alpha, p38MAPK, p38a, p38alpha | Synapse,Pole,Cytoplasm,Cytosolic Part,Nucleus,Cytosol,Mitochondrion,Soluble Fraction,Glucose Metabolic Process,Positive Regulation Of Transcription From Rna Polymerase II Promoter,Transcription Dna Dependent,Protein Amino Acid Autophosphorylation,Fatty Acid Oxidation,Response To Stress,Angiogenesis,Protein Kinase Cascade,Regulation Of Transcription,Dependent,MapkK Cascade Go 0000165,Protein Amino Acid Phosphorylation,Phosphorylation,Innate Immune Response,Phosphorylation,Apoptosis Go,Nucleotide Binding,Protein Kinase Activity,Protein Tyrosine Kinase Activity,Transferase Actv | GAAGACCTCTCACTGGAACTCCAAATACCTCAAGTCCCTCTTGTGAAGATCTCTGATGGTGAAGGGGT<br>GCTGATGATCTATTGATGCTG       | mitogen-activated protein kinase 14                                      |
| Mapk3    | <a href="#">NM_011952.2</a>    | Etk-1, Erk1, Erk2, Esk1, Mnk1, Map2k, Prkm3, p44, p44erk1, p44mapk               | Nucleoplasm,Cytoplasm,Innate Immune Response,Positive Regulation Of Translation,Positive Regulation Of Transcription From Rna Polymerase II Promoter,Signal Transduction,Transcription Dna Dependent,Response To Toxin,Organ Morphogenesis,Regulation Of Transcription Factor Activity,Protein Complex A                                                                                                                                                                                                                                                                                              | ACCTTAATTGCATCAATTAACATGAAGGCCGAACTACCTGAGCTGCTGCCCTGAAAACAAGGCTGGGCCA<br>GCTTCTTCTTAATGCTGACTC     | mitogen-activated protein kinase 3                                       |
| Mapk8    | <a href="#">NM_016700.3</a>    | A1849689, JNK, JNK1, Prkm8, SAPK1                                                | Cytoplasm,Neurite Development,Signal Transduction,Response To Heat,Jnk Cascade,Inflammatory Response,Regulation Of Transcription,Dependent,Response To Uv,Positive Regulation Of Cell Migration,MapkK Cascade Go 0000165,Protein Amino Acid Phosphorylation,Phosphorylation                                                                                                                                                                                                                                                                                                                           | GAACAACGGCTAAATACGCTGGATAGTGTGAAGAACTGTTCCCGATGTGTTTTCCAGCTGACTCAGACAT<br>AACCAACTAAGCCGCTGAG       | mitogen-activated protein kinase 8                                       |
| Mapkap2  | <a href="#">NM_008551.1</a>    | AA960234, MAPKAP-K2, MK-2, MK2, Rps6kc1                                          | Cytoplasm,Nucleus,Inflammatory Response,Response To Stress,Protein Amino Acid Phosphorylation,Phosphorylation,Response To Dna Damage Stimulus,Nucleotide Binding,Protein Kinase Activity,Kinase Activity,Protein Serine Threonine Kinase Activity,Transferase Activity,Transferring Phosphorus Containing Groups,Atp Binding                                                                                                                                                                                                                                                                          | GTAGCCTGCTGCCCTTCTGCCACGATTAACCCACTTCTGAGTCTCTGAAATTTTGAACCTCTCAATGGG<br>CTGTCACTCCACCGGTGAG        | MAP kinase-activated protein kinase 2                                    |
| Mapkap5  | <a href="#">XM_990515.1</a>    | MK5, PRAK                                                                        | Cytoplasm,Nucleus,Protein Amino Acid Autophosphorylation,Regulation Of Translation,Ras Protein Signal Transduction,Response To Stress,Protein Amino Acid Phosphorylation,Phosphorylation,Nucleotide Binding,Protein Kinase Activity,Kinase Activity,Protein Serine Threonine Kinase Activity,Transferase Activity,Transferring Phosphorus Containing                                                                                                                                                                                                                                                  | GGCTGAGGAGGCAACACTCTCCGACCCGCTAAGCTGACGAGGACGACGATCCGCGACGCTCCGCGCT<br>CTTACGTCTTCAACCCAGCGCCAC     | MAP kinase-activated protein kinase 5                                    |
| Masp1    | <a href="#">NM_008555.2</a>    | AW048060, CCP1I, Carf, Masp1/3                                                   | Extracellular Region,Extracellular Space,Proteolysis,Innate Immune Response,Serine Type Peptidase Activity,Protein Homodimerization Activity,Calcium Ion Binding,Peptidase Activity,Serine Type Endopeptidase Activity                                                                                                                                                                                                                                                                                                                                                                                | COGGAGGAGGTTTGGAACTCAAGCTTTACTCATGCACTCACTGGAATCTCCTCTTGTGTAACGACTATGTG<br>GAGGTAGAAAACAGAACGAC     | mannan-binding lectin serine peptidase 1                                 |
| Masp2    | <a href="#">NM_010787.3</a>    | MASP-2, Msp19                                                                    | Extracellular Region,Proteolysis,Innate Immune Response,Serine Type Peptidase Activity,Calcium Ion Binding,Peptidase Activity,Serine Type Endopeptidase Activity                                                                                                                                                                                                                                                                                                                                                                                                                                      | TAACCTGGTCCAGCTAAAGTCACTTCCACTCCGACTCCCAAGTGAAGAGCGCTTCCAGCGTTGAGCGCTT<br>TATGAGGCGAGGATGTGATG      | mannan-binding lectin serine peptidase 2                                 |
| Max      | <a href="#">NM_008558.1</a>    | AA960152, A1875693, bHLH4, bHLH45, bHLH46, bHLH47, bHLH48                        | Complex Binding,Sequence Specific Dna Binding,Transcription Factor Activity,Protein Heterodimerization Activity,Dna Binding                                                                                                                                                                                                                                                                                                                                                                                                                                                                           | CCGGCCCGCTCGACTGGCCGCTCCCTGGCCCTAGGAAATGAGCGATAAGTACATCGAGTGGAGGCGCA<br>CGAAGAACAGGGAGGTTCACTCT     | Max protein                                                              |
| Mb12     | <a href="#">NM_010778.1</a>    | L-MBP, MBL, MBL-C, MBP-C                                                         | Extracellular Region,Extracellular Space,Collagen,Protein Oligomerization,Innate Immune Response,Sugar Binding,Receptor Binding                                                                                                                                                                                                                                                                                                                                                                                                                                                                       | CCCTGAGAACTGGGTGCTCTCTCTCTGATGAAAAGTTGGAAGAAATTTTGTGAGCAGTGTAAAAGATGA<br>GGCTTGACAGGATGAAGGCGCT     | mannose-binding lectin (protein C) 2                                     |
| Mef2a    | <a href="#">XM_976032.1</a>    | A430079H05Rk                                                                     | Nucleus,Nuclear Chromatin,Positive Regulation Of Transcription,Dependent,Nervous System Development,Positive Regulation Of Transcription From Rna Polymerase II Promoter,Transcription Dna Dependent,Multicellular Organismal Development,Regulation Of Transcription From Rna Polymerase II Promoter,Regulation Of Transcription,Dependent,Neg                                                                                                                                                                                                                                                       | AAGTATCATCAATGGCTCTTACAGAACTGTGTATGCACTGTGCTCTCAACATTTTACAAAACAAGCAAC<br>AAACAAGAAGCTGATGGAAG       | myocyte enhancer factor 2A                                               |
| Mef2b    | <a href="#">NM_01045484.1</a>  | AH451606                                                                         | Nucleus,Regulation Of Transcription,Dependent,Transcription Factor Activity                                                                                                                                                                                                                                                                                                                                                                                                                                                                                                                           | GACAGCTGGCCACGGTACGCTCCCAAGGTTCTCCAGGCTCCACAGATTCGCGAAGTCCAGGTTCCCTATCC<br>ACCAGGAGGACGACGAGGCGCA   | myocyte enhancer factor 2B                                               |
| Mef2c_Mm | <a href="#">NM_025282.2</a>    |                                                                                  | Nucleus,Positive Regulation Of Transcription,Dependent,Nervous System Development,Positive Regulation Of Transcription From Rna Polymerase II Promoter,Transcription Dna Dependent,Multicellular Organismal Development,Regulation Of Transcription,Dependent,Transcription From Rna Polymerase II Promoter,Apoptosis Go,Protein Homodimerizat                                                                                                                                                                                                                                                        | ATAAATCGTAAGCCGATCTCCGCTTCTTATCCACCTGGCAGCAAGAACGATGCCATCGATGAATCAAAGGATA<br>ATAACTCCAGTGGCTCAGT    | myocyte enhancer factor 2C                                               |
| Mef2d    | <a href="#">NM_133665.3</a>    | C80750                                                                           | Regulation Of Translation,Response To Stress,Protein Kinase Cascade,Protein Amino Acid Phosphorylation,Phosphorylation,Nucleotide Binding,Protein Kinase Activity,Kinase Activity,Protein Serine Threonine Kinase Activity,Transferase Activity,Transferring Phosphorus Containing Groups,Atp Binding                                                                                                                                                                                                                                                                                                 | TCAGCTGTAAGAGGATGCGGCTGGATCTGGACATTAAGGATGTGCCATCCCTCCTTCAAGCTCCCTGAT<br>GAAGATTTGCAACTCTCACCCG     | myocyte enhancer factor 2D                                               |
| Mnk1     | <a href="#">NM_021461.4</a>    | 2410048M24Rk, Mnk1                                                               | Proteinaceous Extracellular Matrix,Extracellular Region,Nucleus,Dendrite,Extracellular Space,Extracellular Matrix,Protein Complex,Regulation Of Cell Migration,Proteolysis,Zinc Ion Binding,Calcium Ion Binding,Metalloproteinase Activity,Protein Complex Binding,Peptidase Activity,Metalloendopeptidase Activity                                                                                                                                                                                                                                                                                   | AAGGCATTCGCTCCGCTGATCAAGCCAGAAACATCTGTGTAATCCAGAAAGGTTGCTCCGGTGAATTT<br>GTGACTTTGACTTGGCCAGTGG      | MAP kinase-interacting serine/threonine kinase 1                         |
| Mmp3     | <a href="#">NM_010809.1</a>    | SLN-1, SLN1, STR-1, Stry1, Str1                                                  | Proteinaceous Extracellular Matrix,Extracellular Region,Extracellular Space,Extracellular Matrix,Protein Complex,Skeletal Development,Embryo Implantation,Proteolysis,Response To Oxidative Stress,Positive Regulation Of Angiogenesis,Tissue Remodeling,Response To Drug,Zinc Ion Binding,Metalloproteinase Activity,Protein Complex Binding,Peptidase                                                                                                                                                                                                                                               | TCCTTGTGAAGAAAGTGGTCTTGTCAAGCTGTGCTATGGCAGACCAACAGGAGCTATGATGACCAACGCTCAAC<br>GTCAAGTTGCAAGGATGTTCA | matrix metalloproteinase 3                                               |
| Mmp9     | <a href="#">NM_013599.2</a>    | AW743869, BMMMP9, C1g4b, MMP-9, pro-MMP-9                                        | Proteinaceous Extracellular Matrix,Extracellular Region,Extracellular Space,Extracellular Matrix,Protein Complex,Skeletal Development,Embryo Implantation,Proteolysis,Response To Oxidative Stress,Positive Regulation Of Angiogenesis,Tissue Remodeling,Response To Drug,Zinc Ion Binding,Metalloproteinase Activity,Protein Complex Binding,Peptidase                                                                                                                                                                                                                                               | CCTCTCAGAGTCTTGTAGTCCGAGACAACTCGCAATGTGGATGTTTTGTGCTATTGCTGATGACCCAGCGG<br>CTCTGATTTCTCAAGGACGG     | matrix metalloproteinase 9                                               |

## Continue Table S1: Nanostring nCounter SC Mouse Inflammation V2 Panel Gene List

|          |                                |                                                              |                                                                                                                                                                                                                                                                                                                                                                                                                                                                                                                                                                                                                                                        |                                                                           |                                                                            |
|----------|--------------------------------|--------------------------------------------------------------|--------------------------------------------------------------------------------------------------------------------------------------------------------------------------------------------------------------------------------------------------------------------------------------------------------------------------------------------------------------------------------------------------------------------------------------------------------------------------------------------------------------------------------------------------------------------------------------------------------------------------------------------------------|---------------------------------------------------------------------------|----------------------------------------------------------------------------|
| Mrc1     | <a href="#">NM 008625.1</a>    | AWZ59686, CD206, MR                                          | Cell Surface, Membrane, Integral To Membrane, Endosome, Plasma Membrane, Receptor Mediated Endocytosis, Sugar Binding, Receptor Activity, Transmembrane Receptor Activity                                                                                                                                                                                                                                                                                                                                                                                                                                                                              | GTTCGGAAATTTGAGGGAATGGCTTGGTTGAACGCAATCTGTCTCTTTGCACTGGAAGGAGGGATCC       | mannose receptor, C type 1                                                 |
| Mrc2     | <a href="#">NM 013606.1</a>    | AIS28743, Mrc-2                                              | Cytoplasm, Cytoplasm, Response To Virus, Innate Immune Response, Gtp Binding, Nucleotide Binding, G-protein Activity                                                                                                                                                                                                                                                                                                                                                                                                                                                                                                                                   | GTTCCTCCCTGTGTCTCTCGATTGTGATTCAGGACGAGAAAGGGCTCCCTGGTATACACCCAGCGCT       | myxovirus (influenza virus) resistance 2                                   |
| Myc      | <a href="#">NM 010849.4</a>    | AU016757, Myc2, Nard, Nrd, bHLHe39                           | Nucleoplasm, Axon, Cytoplasm, Nucleus, Spindle, Nuclear Body, Protein Complex, Nucleolus, Glucose Metabolic Process, Positive Regulation Of Transcription, DNA Dependent, Positive Regulation Of Cell Proliferation, Chromatin Remodeling, Positive Regulation Of Transcription From Rna Polymerase II Promoter, Transcription Dna Dependent, Positive Regulation Of                                                                                                                                                                                                                                                                                   | CCCTCAAGGTGAACCTCACCAAGAGAACTAGACCTGACTAGACTCGTACAGCGCTTATTCATCGCGAGG     | myelocytomatosis oncogene                                                  |
| Myd88    | <a href="#">NM 010851.2</a>    |                                                              | Cytoplasm, Cytoplasm, Protein Complex, Plasma Membrane, Response To Virus, Positive Regulation Of Transcription From Rna Polymerase II Promoter, Signal Transduction, Cell Surface Receptor Linked Signal Transduction, Go 0007166, Activation Of NF KappaB Transcription Factor, Ikb, Cascade, Positive Regulation Of I KappaB Kinase NF KappaB I Cascade Inflammation                                                                                                                                                                                                                                                                                | GCTCGAGGCTACGCTTCTTCCGCCAGGAGGTTGCATCTCTTATCTCCCTGCTTACCATAGAGGCA         | myeloid differentiation primary response gene 88                           |
| Myo2     | <a href="#">NM 010861.3</a>    | MLC2, MLC-2v, Mlc2v, Myhc                                    | Myofibril, Cytoskeleton, Myosin Complex, Heart Development, Calcium Ion Binding                                                                                                                                                                                                                                                                                                                                                                                                                                                                                                                                                                        | TGCTGCTAGGAGGAGTGCATGAAATGATCGAATGATGAAAGAGGCTCCAGGTCATTAATCT             | myosin, light polypeptide 2, regulatory, cardiac, slow                     |
| Nfat3    | <a href="#">NM 010901.2</a>    | C80703, DBErd281e, NFAT4, NFATx                              | Cytoplasm, Nucleus, Cytoplasm, Plasma Membrane, Nucleolus, Positive Regulation Of Transcription, DNA Dependent, Positive Regulation Of Transcription From Rna Polymerase II Promoter, Regulation Of Transcription, DNA Dependent, Heart Development, Cellular Respiration, Transcription Factor Activity, Chromatin Binding, DNA Binding                                                                                                                                                                                                                                                                                                               | GGGCTCACCATTGTCCCTGAGTTCTCCCTATCATCAACCCAGAGATACATCTGCGGTGAGGTCATTTATGTTG | nuclear factor of activated T cells, cytoplasmic, calcineurin dependent 3  |
| Nfe2l2   | <a href="#">NM 010902.3</a>    | A1194320, Nfe2                                               | Chromatin, Cytoplasm, Nucleus, Centrosome, Plasma Membrane, Positive Regulation Of Transcription, DNA Dependent, Positive Regulation Of Transcription From Rna Polymerase II Promoter, Transcription Dna Dependent, Unfolded Protein Response, Regulation Of Transcription, DNA Dependent, Protein Domain Specific Binding, Sequence Specific DNA Binding, Transcription                                                                                                                                                                                                                                                                               | CCAGGAGCAATCAATGAAGCTCACTGCGATTGATCCGAGATACGAGGAGAGTAAAGAAATGCGCCGCC      | nuclear factor, erythroid derived 2, like 2                                |
| Nfk1     | <a href="#">NM 008689.2</a>    | NF-KB1, NF-kappaB, NF-kappaB1, p105, p50, p50/p105           | Cytoplasm, Nucleus, Cytoplasm, Mitochondrion, Protein Complex, Positive Regulation Of Transcription, DNA Dependent, Positive Regulation Of Transcription From Rna Polymerase II Promoter, Signal Transduction, Transcription Dna Dependent, Negative Regulation Of Transcription, DNA Dependent, Response To Oxidative Stress, Regulation Of Transcription, DNA Dependent                                                                                                                                                                                                                                                                              | GTCTTACACTAGCCATCCACCTCCAGCTCAGCTGTGGAGGGATCTGCTGGAAGTCACATGGTTGATCTGTG   | nuclear factor of kappa light polypeptide gene enhancer in B cells 1, p105 |
| Nlr3     | <a href="#">NM 145827.3</a>    | AGTAVPR1, AIMAVP, Cas1, FCAS, FCU, MWS, Mmig1, NALP3, Pypal1 | Cytoplasm, Positive Regulation Of Caspase Activity, Defense Response To Virus, Inflammatory Response, Apoptosis, Go, Caspase Activation, Nucleotide Binding, Apb Binding                                                                                                                                                                                                                                                                                                                                                                                                                                                                               | TTGTCAGGATCGCATGGTTGTGAGCTCCCAACTCTCTCCAGACGTACATGGAGAAATGCTTCGGGAGA      | NLR family, pyrin domain containing 3                                      |
| Nod1     | <a href="#">NM 172729.2</a>    | C230079P11, Card4, F830007N14Rk, Nlr1                        | Membrane, Cytoplasm, Basolateral Plasma Membrane, Plasma Membrane, Interleukin 8 Biosynthetic Process, Defense Response, Activation Of NF KappaB Transcription Factor, Positive Regulation Of I KappaB Kinase NF KappaB Cascade, Defense Response To Bacterium, Regulation Of Apoptosis, Apoptosis, Go, Caspase Activation, Nucleotide Binding, Protein Homodimerization                                                                                                                                                                                                                                                                               | TGGATCATCTCCGTGTCTCCAGCATCCAGAGGCTGTGAGGGCTCTCTCCAGTTCGGCGACTGCTGTGTG     | nucleotide-binding oligomerization domain containing 1                     |
| Nod2     | <a href="#">NM 145857.2</a>    | ACUG, BLAU, CD, Card15, F830032C23Rik, IBD1, Nlr2            | Cell Surface, Cytoplasm, Vesicle, Cytoplasm, Plasma Membrane, Protein Oligomerization, Positive Regulation Of Cell Proliferation, Signal Transduction, Defense Response, Activation Of NF KappaB Transcription Factor, Positive Regulation Of I KappaB Kinase NF KappaB Cascade, Inflammatory Response, Activation Of Immune Response, Defense Response To Bacterium                                                                                                                                                                                                                                                                                   | CTGTGAAGAGGGGATATCTCTCGCAAGAGACTCAAGAAATCACTTGGAAATGTGAAGCTCCCAACA        | nucleotide-binding oligomerization domain containing 2                     |
| Nos2     | <a href="#">NM 010927.3</a>    | NOS-2, Nos-2, Nos2a, iNOS, iNOS                              | Cytoplasm, Nucleus, Cytoplasm, Peroxisome, Vesicle Membrane, Signal Transduction, Superoxide Metabolic Process, Regulation Of Phosphorylation, Inflammatory Response, Regulation Of Heart Contraction, Protein Kinase Cascade, Regulation Of Catalytic Activity, Defense Response To Bact                                                                                                                                                                                                                                                                                                                                                              | CCCCCTCCCTCCACCTACCAAGTAGTATTTACTTATGAGACTACTAACTCTCTCTCTCTCCCTCCCTCTCT   | nitric oxide synthase 2, inducible                                         |
| Nox1     | <a href="#">NM 172203.1</a>    | GPB1-2, MOX1, NOH1, NOH1, NOX1a, NOX1alpha, Nox-1            | Cell Junction, Membrane, Cytoplasm, Early Endosome, Integral To Membrane, Cell Projection, Endosome, Plasma Membrane, Positive Regulation Of Cell Proliferation, Signal Transduction, Superoxide Metabolic Process, Response To Stress, Angiogenesis, Transport, Cell Migration, Electron Carrier Activity, Oxidoreductase Activity                                                                                                                                                                                                                                                                                                                    | CTCCAACTGACAGATGATATGACAGTATTCAGAGTATGTCGGCCCTACTGAGAGTATGCCACTGATGCTTGGT | NADPH oxidase 1                                                            |
| Nrc3c1   | <a href="#">NM 008173.3</a>    | GR, Gd-1, Gf1                                                | Membrane, Cytoplasm, Nucleus, Cytoplasm, Protein Complex, Chromatin Remodeling, Positive Regulation Of Transcription From Rna Polymerase II Promoter, Transcription Dna Dependent, Regulation Of Transcription, DNA Dependent, Anti Apoptosis, Regulation Of Cell Proliferation, Protein Homodimerization Activity, Hormone Binding, Protein Complex Binding, Transcription                                                                                                                                                                                                                                                                            | ACAGGATTCAGAACTACCACTGGATGACCAAGTCCCTCTACAGTCTCATGATGTTCTTCACTGGATTGGCC   | nuclear receptor subfamily 3, group C, member 1                            |
| Oas1a    | <a href="#">NM 145211.2</a>    | L3                                                           | Regulation Of Transcription From Rna Polymerase II Promoter, Transcription Dna Dependent, Regulation Of Transcription, DNA Dependent, Anti Apoptosis, Regulation Of Cell Proliferation, Protein Homodimerization Activity, Hormone Binding, Protein Complex Binding, Transcription                                                                                                                                                                                                                                                                                                                                                                     | TCTGATCAGGAGTGAGTTGATGTGTGCTGCCAGCTTGTGATGCTGGTCACTGTAATCACTCCAGCAAGCTGA  | 2'-5' oligoadenylate synthetase 1A                                         |
| Oas2     | <a href="#">NM 145227.2</a>    | Oasf11                                                       | Cytoplasm, Rna Catabolic Process, Zinc Ion Binding                                                                                                                                                                                                                                                                                                                                                                                                                                                                                                                                                                                                     | CTGTGGAACTTAAAGAGGCGGTGCAACTCCAGGAGTGACTCTCTATGAAACACTCCATCCATTTCTGATGT   | 2'-5' oligoadenylate synthetase 2                                          |
| Oasf1    | <a href="#">NM 145209.2</a>    | 7530414C13Rik, oasf9                                         |                                                                                                                                                                                                                                                                                                                                                                                                                                                                                                                                                                                                                                                        | ATGCTTTGAGTGGCTCAGCG                                                      | 2'-5' oligoadenylate synthetase-like 1                                     |
| Oasf1    | <a href="#">NM 145209.2</a>    | 7530414C13Rik, oasf9                                         | Cell Surface, Extracellular Region, Membrane, Extracellular Space, Microvillus, Positive Regulation Of Cell Proliferation, Regulation Of Fc(gamma)R Tyrosine Phosphorylation, Multicellular Organismal Development, Organ Morphogenesis, Positive Regulation Of Map Kinase Activity, Angiogenesis, Actin Cytoskeleton Organization And Biogenesis, Positive Regulation                                                                                                                                                                                                                                                                                 | TGTGGTGGGTGACACTCTGCAACTATGATGTTGCTTCAATGAGGCTGGCTTGTCTCTCTCTCTCTCT       | platelet derived growth factor, alpha                                      |
| Pdgfra   | <a href="#">NM 008808.3</a>    |                                                              | Golgi Apparatus, Membrane, Nuclear Envelope, Plasma Membrane, Phosphoinositide Mediated Signaling, Phosphorylation, Nucleotide Binding, Phosphotransferase Activity                                                                                                                                                                                                                                                                                                                                                                                                                                                                                    | CTCACTTGAAGCAAGTCTGGCCGCTGTCTTAAAGAGTCACTGGTGTGTTTACTGAACCTTGAAGGACA      | phosphatidylinositol 3-kinase, C2 domain containing, gamma polypeptide     |
| Pknox1   | <a href="#">NM 011084.2</a>    | C80387, PK3K-C2-gamma                                        | Golgi Apparatus, Cytoplasm, Endoplasmic Reticulum, Nucleus, Cytoplasmic Vesicle, Perinuclear Region Of Cytoplasm, Membrane Fraction, Lipid Catabolic Process, Positive Regulation Of Cell Proliferation, Response To Organic Substance, Regulation Of Cell Proliferation, Calcium Ion Binding, Phospholipase A2 Activity, Phospholipase Activity                                                                                                                                                                                                                                                                                                       | TACCAAGGAGCAACCAAGCAAGTGGTCACTGGATGCTAATGGCTGGTGGAGGCTGGCTTATCAATACC      | phospholipase A2, group IVA (cytosolic, calcium-dependent)                 |
| Pla2g4a  | <a href="#">NM 008869.2</a>    | Pla2g4, cPLA2, cPLA2alpha                                    | Cytoplasm, Nucleus, Cytoplasm, Membrane Fraction, Nuclear Chromatin, Nuclear Speck, Lipid Catabolic Process, Positive Regulation Of Transcription, DNA Dependent, Insulin Receptor Signaling Pathway, Glutamate Signaling Pathway, G2/M Transition Of Mitotic Cell Cycle, Signal Transduction, Negative Regulation Of Transcription Dna Dependent, Regulation Of G-Protein                                                                                                                                                                                                                                                                             | CCAGGAGGCGCATCTCTTAAAACATCTAGTATGTTCTGACAGACGGAAGGCGTTGAACCTGACTAGAG      | phospholipase C, beta 1                                                    |
| Pcb1     | <a href="#">NM 010877.1</a>    | 311004321Rik, A1132408, Pcb, mkIAA0581                       |                                                                                                                                                                                                                                                                                                                                                                                                                                                                                                                                                                                                                                                        | GACTTCTAGGTGGAGTCAAGGA                                                    | phospholipase C, beta 1                                                    |
| Ppp1r12b | <a href="#">NM 001081307.1</a> | 18100370O3Rik, 9530009M10Rk, A1132431, Mypl2                 | Cytoplasm, Actin Cytoskeleton, Plasma Membrane                                                                                                                                                                                                                                                                                                                                                                                                                                                                                                                                                                                                         | CACCGGACTTAACTCTGGCAAGTCAAGAGTCAAGAGTCTCTCAAGGAGTCAAGAAAGCTTGCATGAAA      | protein phosphatase 1, regulatory (inhibitor) subunit 12B                  |
| Pkca     | <a href="#">NM 011101.3</a>    | A1875142, Pkca                                               | Membrane, Cytoplasm, Endoplasmic Reticulum, Nucleus, Cytoplasm, Peroxisome, Protein Complex, Plasma Membrane, Regulation Of Muscle Contraction, Protein Amino Acid Autophosphorylation, Regulation Of Peptidyl Tyrosine Phosphorylation, Angiogenesis, Negative Regulation Of Ca Membrane, Cytoplasm, Insoluble Fraction, Nucleus, Cytoplasm, Membrane Fraction, Centrosome, Plasma Membrane, Soluble Fraction, Transcription Dna Dependent, Regulation Of Growth, Calcium Ion Transport, Activation Of NF KappaB Transcription Factor, Positive Regulation Of I KappaB Kinase NF KappaB Cascade, Regulation Of Transcription From Rna Polymerase II P | TGGCTCAGCATGGTGGTGGTGGTGGTCAATGACAGAGACACACAGGTTGTAAACAGCCTTACTGTGACC     | protein kinase C, alpha                                                    |
| Pkcb     | <a href="#">NM 008852.2</a>    | A130082F03Rik, PKC-Beta, Pkcb, Pkcb1, Pkcb2                  | Membrane, Integral To Membrane, Plasma Membrane, Signal Transduction, G Protein Coupled Receptor Protein Signaling Pathway, G Protein Coupled Receptor Activity, Receptor Activity                                                                                                                                                                                                                                                                                                                                                                                                                                                                     | TACGATTTAGCTGCCAAAGAGCCAGAGCACTGTGCTCCTACTCTGCTATTAGGCACTGACATCGAAGAG     | protein kinase C, beta                                                     |
| Ptger1   | <a href="#">NM 013841.2</a>    | 42kDa, EP1, Ptgerp1                                          | Membrane, Integral To Membrane, Plasma Membrane, Signal Transduction, G Protein Coupled Receptor Protein Signaling Pathway, G Protein Coupled Receptor Activity, Receptor Activity                                                                                                                                                                                                                                                                                                                                                                                                                                                                     | TTGGCTGGCGGCTCTCTGGGCTAGTGTCACATGCGCTGCGGGGCTGGGCTGCTCCGCTCCGCTCGGAG      | prostaglandin E receptor 1 (subtype EP1)                                   |
| Ptger2   | <a href="#">NM 008964.4</a>    | EP2, Ptgerp2                                                 | Membrane, Integral To Membrane, Plasma Membrane, Signal Transduction, G Protein Coupled Receptor Protein Signaling Pathway, Regulation Of Cell Proliferation, G Protein Coupled Receptor Activity, Receptor Activity                                                                                                                                                                                                                                                                                                                                                                                                                                   | TGTAAAGGCTGGGATATAACAGATAACCTCCCTCGAAGAGCAGATGAACACAGCTTATGAGTATTGGGCG    | prostaglandin E receptor 2 (subtype EP2)                                   |



## Continue Table S1: Nanostring nCounter SC Mouse Inflammation V2 Panel Gene List

|         |                                |                                                                                                                      |                                                                                                                                                                                                                                                                                                                                                         |                                                                                                     |                                                             |
|---------|--------------------------------|----------------------------------------------------------------------------------------------------------------------|---------------------------------------------------------------------------------------------------------------------------------------------------------------------------------------------------------------------------------------------------------------------------------------------------------------------------------------------------------|-----------------------------------------------------------------------------------------------------|-------------------------------------------------------------|
| Piger3  | <a href="#">NM_011199.2</a>    | EP3, Pgersp3, Pgersp3                                                                                                | Plasma Membrane,G Protein Signaling Coupled To Iq3 Second Messenger,phospholipase C Activating,G Protein Signaling Coupled To Camp Nucleotide Second Messenger Receptor Activity                                                                                                                                                                        | TCTAATAGCCATGAGCCAAACAGCAAAAAAGTCTACATGAGAGGCGAAGAGATTGTGCAAGGGTATTGTG<br>CCAAGAGGTTACAGTACCAK      | prostaglandin E receptor 3 (subtype EP3)                    |
| Piger4  | <a href="#">NM_008965.1</a>    | EP4, Pgersp4                                                                                                         | Membrane,Integral To Membrane,Plasma Membrane,Signal Transduction,Ink Cascade,Positive Regulation Of Cytokine Secretion,G Protein Signaling Coupled To Camp Nucleotide Second Messenger,G Protein Signaling Adenylate Cyclase Activating Pathway,G Protein Coupled Receptor Protein Signaling Pathway,G Protein Coupled Receptor Activity,Receptor Ac   | GGTGGCCATCGTATGTTGCAAGTGGCGCAAGGAGCAGAAAGAGACCTTTTACACTGATGTGGGGCTGG<br>GTCTCACTGACCTCTGGGCAAC      | prostaglandin E receptor 4 (subtype EP4)                    |
| Pigr    | <a href="#">NM_008966.3</a>    | A1957154, PGF, Ip                                                                                                    | Membrane,Cytoplasm,Integral To Membrane,Plasma Membrane,Negative Regulation Of Apoptosis,Signal Transduction,G Protein Coupled Receptor Protein Signaling Pathway,G Protein Coupled Receptor Activity,Receptor Activity                                                                                                                                 | TGGGCTTATTTCTGCTACGGAGGGTCTCTTAAAGCACTGTAACTTGGCCAGTGGCTGTGGATTAAGTC<br>ATCAGCTTGCATCTGGGAAC        | prostaglandin F receptor                                    |
| Pigr    | <a href="#">NM_008967.3</a>    | IP, PGI2                                                                                                             | Membrane,Integral To Membrane,Plasma Membrane,Signal Transduction,G Protein Coupled Receptor Protein Signaling Pathway,G Protein Coupled Receptor Activity,Receptor Activity                                                                                                                                                                            | GGTCTATGGCTCTCAAGAGGATTTCTCTCAAATAACCGAGGCTGGCAGGCTGCTGCGCCCTGGCTCTCC<br>ATCATCTCTCTGCTAAATAT       | prostaglandin I receptor (IP)                               |
| Pigs1   | <a href="#">NM_008969.3</a>    | COX1, Cox-1, Cox-3, PGHS-1, PHS 1, Pghs1                                                                             | Cytoplasmic Part,Golgi Apparatus,Membrane,Cytoplasm,Endoplasmic Reticulum,Nucleus,Microsome,Nuclear Envelope,Plasma Membrane,Fatty Acid Biosynthetic Process,Lipid Biosynthetic Process,Response To Oxidative Stress,Keratinocyte Differentiation,Regulation Of Blood Pressure,Regulation Of Cell Proliferation,Lipid Binding,Oxidoreductase Activity   | TTTAGAGTTCTACCCGGGGTGGCTGGAGAGTGCACCGCAACCTCCATCTTGGAGAAGATATGATAGAGTGG<br>GGGCTCCCTTTCCTCCAGGGCC   | prostaglandin-endoperoxide synthase 1                       |
| Pigs2   | <a href="#">NM_011198.3</a>    | COX2, Cox-2, PGHS-2, PHS-2, Pghs2, TIS10                                                                             | Membrane,Cytoplasm,Endoplasmic Reticulum,Nucleus,Protein Complex,Neuron Projection,Positive Regulation Of Cell Proliferation,Negative Regulation Of Cell Cycle,Fatty Acid Biosynthetic Process,Lipid Biosynthetic Process,Inflammatory Response,Angiogenesis,Embryo Implantation,Response To Oxidative Stress,Keratinocyte Differentiation,Negative R   | CCATCGATTTTTCAACAGCAGATCAATAGGAGGAGCTGGTTCACCGAGGACTGGGCCATGGAGTAAATC<br>ACATTTATGGTAACTCTGGAC      | prostaglandin-endoperoxide synthase 2                       |
| Pik2    | <a href="#">NM_007982.2</a>    | FAK, FRNK, Fack, mKIAA4203, p125FAK                                                                                  | Membrane,Membrane,Cytoplasm,Lamellipodium,Nuclear Body,Basolateral Plasma Membrane,Focal Adhesion,Apical Plasma Membrane,Plasma Membrane,Nucleolus,Positive Regulation Of Cell Proliferation,Negative Regulation Of Apoptosis,Protein Amino Acid Autophosphorylation,Microtubule Cytoskeleton Org                                                       | GTGACATTTGCAAGAGAGTCTCAAGTGTCCCTGGCTCAAGTGATCATTTCTGGTAATGGCAATCGCGC<br>CAGAAGAGGGATCATTTACT        | PTK2 protein tyrosine kinase 2                              |
| Rac1    | <a href="#">NM_009007.2</a>    | AL023026, D5Ems559e                                                                                                  | Membrane,Membrane,Cytoplasm,Lamellipodium,Cytoplasmic Vesicle,Cell Projection,Cytoplasmic Membrane,Sound Vesicle,Membrane Fraction,Plasma Membrane,Actin Filament Organization,Axon Guidance,Regulation Of Cell Migration,Interleukin Junction Assembly And Maintenance,Actin Cytoskeleton Organization And Biog                                        | GCCAAAATACCTCTGAACTAGTTGGGTGTGCTGAGAAACACCTAAGCACTAACTCTCTGGAAGCACTCTTGCT<br>AAGAAGACCGCAGCTCTGGGA  | RAS-related C3 botulinum substrate 1                        |
| Raf1    | <a href="#">NM_029790.3</a>    | 6430402F14Rik, AA90557, BB129353, Craf1, D83050J10Rik, Raf-1, c-Raf, v-Raf                                           | Membrane,Cytoplasm,Insoluble Fraction,Nucleus,Cytoplasm,Mitochondrion,Plasma Membrane,Negative Regulation Of Apoptosis,Signal Transduction,Protein Kinase Cascade,Negative Regulation Of Cell Proliferation,MapkK Cascade Go 0000165,Cytoskeleton Organization And Biogenesis,Protein Amino Acid Phosphorylation,Phosphorylation,Apoptosis Go,Response  | CCTCAGATGGCAAGCTCACGGATCTCTTAAGACAAGCACTACTCCGGTTTTCTGCCGAATAAGAAAGGA<br>CTGTGGCTCAATCGCGGAATGG     | vraf-leukemia viral oncogene 1                              |
| Rapgef2 | <a href="#">NM_001099624.2</a> | 5830453M24Rik, CNRasGEF, Pdagef1, RA-GEF-1, mKIAA0313, nRapGEP                                                       | Membrane,Plasma Membrane,Signal Transduction,Regulation Of Catalytic Activity,Regulation Of Small GTPase Mediated Signal Transduction,Small GTPase Mediated Signal Transduction,Protein Kinase Binding,Guanyl Nucleotide Exchange Factor Activity                                                                                                       | TTAATCAGTATGAGTGTGAGTGAGGAGCTGGGGTGGTGGAGGAGTCCAGCTGTGTACTGCTCTTCAAGA<br>CAGCCTCCCTTTGGTGGATCC      | Rap guanine nucleotide exchange factor (GEF) 2              |
| Rela    | <a href="#">NM_009045.4</a>    | p65                                                                                                                  | Cytoplasm,Nucleus,Cytoplasm,Transcription Factor Complex,Protein Complex,Positive Regulation Of Transcription,Dna Dependent,Positive Regulation Of Cell Proliferation,Negative Regulation Of Apoptosis,Positive Regulation Of Transcription From Rna Polymerase II Promoter,Transcription Dna Dependent,Negative Regulation Of Transcription Dna Depend | GAGGCTGACTCTCCGACACCGCAGTATCCATGCTCCAGAACCTGGGATCCAGTGTGTGAAGAACGAGACCT<br>GGAGCAAGCCATAGCCAGCA     | v-rel reticulendotheliosis viral oncogene homolog A (avian) |
| Relb    | <a href="#">NM_009046.2</a>    | shep                                                                                                                 | Cytoplasm,Nucleus,Cytoplasm,Cytoskeleton,Transcription Dna Dependent,Regulation Of Transcription,Dna Dependent,Transcription Factor Activity,Dna Binding                                                                                                                                                                                                | TTCCTTTGAGCCATTTTACAGAGTGTGAGTCGGAAGGAAAGGGGCTCTCGAGATGAGCCCTCTCAGCAGC<br>AGATCTCGAGATGTTACATA      | v-rel reticulendotheliosis viral (v-rel) oncogene related B |
| Reln1   | <a href="#">NM_020500.3</a>    | RELNalpha, Xcp2                                                                                                      | Extracellular Region,Hormone Activity                                                                                                                                                                                                                                                                                                                   | GAACTCAATGAGACCAAGATTCTCGTGGAGTAAGTCAAGGAACTCTGCCAATCCAGCTACTCATCTCCCTC<br>CAGCTCAAGAGACTCTCTCT     | resistin like alpha                                         |
| Ripk1   | <a href="#">NM_009056.3</a>    | D330015H01Rik, RIP, Rinp, Rip1                                                                                       | Membrane,Cytoplasm,Lipid Raft,Receptor Complex,Mitochondrion,Protein Complex,Plasma Membrane,Positive Regulation Of Transcription From Rna Polymerase II Promoter,Signal Transduction,Protein Amino Acid Autophosphorylation,Activation Of Nf Kappab,Transcription Factor Protein Amino Acid Phosphorylation,Phosphorylation,Apoptosis Go,Nucleotide    | GCTTTGGCCTTTGGTGGACTCTGGCACTATGGCACTTCTCTCTTTGGGCTACTCTGATCTAGCATAGGATA<br>TTTGGAACTCTGGGCCCT       | receptor (TNFRSF)interacting serine-threonine kinase 1      |
| Ripk2   | <a href="#">NM_138952.3</a>    | 2210420D18Rik, CARD3, CARDIAC, CCK, D4Bwg0615e, RICK, RIP2                                                           | Cytoplasm,T Cell Proliferation,I Kappab Kinase Nf Kappab Cascade,Activation Of Nf Kappab,Transcription Factor,Positive Regulation Of I Kappab Kinase Nf Kappab Cascade,Protein Amino Acid Phosphorylation,Immun                                                                                                                                         | CCAGGACATGACCTGACACCGAGTGGAGAAATTTGCCATTTGATTAACCTCATCGAGGCTCATGATCTCTAAT<br>ACAGAGTGGATGGGCGCAAAAC | receptor (TNFRSF)interacting serine-threonine kinase 2      |
| Rock2   | <a href="#">NM_009072.2</a>    | B230113H15Rik, ROKalpha, rho-kinase, Rock-1, Rock2m, mKIAA0619                                                       | Membrane,Cytoplasm,Nucleus,Cytoskeleton,Centrosome,Plasma Membrane,Cytokinesis,Signal Transduction,Negative Regulation Of Angiogenesis,Actin Cytoskeleton Organization And Biogenesis,Protein Amino Acid Phosphorylation,Phosphorylation,Rho Protein Signal Transduction,Nucleotide Binding,Phospholipid Binding,Protein Kinase Activity,Kinase Activ   | ATCACATTTGAGCTTCAACAGAGGTTCCAGCAGCAATAGCCAGAAATTTGGAGTGAATCCCTCAGCAGCGAT<br>GCTGACTCATCTTTAAGAAAT   | Rho-associated coiled-coil containing protein kinase 2      |
| Rps6ka5 | <a href="#">NM_153587.2</a>    | 3110005L17Rik, 6330404E13Rik, A1854034, MSK1, MSPK1, RLPK                                                            | Cytoplasm,Nucleus,Positive Regulation Of Transcription From Rna Polymerase II Promoter,Negative Regulation Of Transcription Dna Dependent,Activation Of Nf Kappab,Transcription Factor,Inflammatory Response,Response To Stress,Protein Kinase Cascade,Regulation Of Transcription,Dna Dependent,Protein Amino Acid Phosphorylation,Phosphorylation,Nu  | TCCTCAGAGTGTGGCTGAGTGTGCTGGCTTAAAGATGTCTCGCTTCTCATTGGAATCGCTGGCTGAC<br>GAAATTTTTCCGGGAAAGCCCT       | ribosomal protein S6 kinase, polypeptide 5                  |
| Shc1    | <a href="#">NM_011368.4</a>    | Shc, ShcA, p66, p66hac                                                                                               | Cytoplasm,Nucleus,Mitochondrion,Plasma Membrane,Insulin Receptor Signaling Pathway,Neurite Development,Regulation Of Growth,Activation Of Mapk Activity,Angiogenesis,Actin Cytoskeleton Organization And Biogenesis,Cell Cell Adhesion,Heart Development,MapkK Cascade Go 0000165,Neuron Differentiation,Protein Complex Binding,Insulin Like           | AACAGCAAGTCTGAGGAGCTGGGTTCTCACTGGTGTGATCAAGGCTGTGTGGAGTCTACACCAATGG<br>AGCCCTTGACTCAATACCGGA        | src homology 2 domain-containing transforming protein C1    |
| Smad7   | <a href="#">NM_001042660.1</a> | Madh7                                                                                                                | Cytoplasm,Nucleus,Centrosome,Transcription Factor Complex,Protein Complex,Plasma Membrane,Nucleolus,Regulation Of Transforming Growth Factor Beta Receptor Signaling Pathway,Transcription Dna Dependent,Protein Stabilization,Regulation Of Transcription,Dna Dependent,Negative Regulation Of Transcription From Rna Polymerase II Promoter,Transf    | CAGCCTGTAGAAGGCTGAACAGAACCAATGTTTTCATCCCTGTCTACTGCGGCTGTACCCCGCTCCATCTGTC<br>GAGTGTCTTTTTGGCCATC    | SMAD family member 7                                        |
| Stat1   | <a href="#">NM_009293.3</a>    | 2010005J02Rik, AA408197                                                                                              | Axon,Cytoplasm,Nucleus,Dendrite,Nucleolus,Positive Regulation Of Transcription,Dna Dependent,Positive Regulation Of Cell Proliferation,Jak Stat Cascade,Positive Regulation Of Transcription From Rna Polymerase II Promoter,Response To Nutrient,Transcription Dna Dependent,Negative Regulation Of Angiogenesis,Response To Bacterium,Cytokine And C  | AGCCTGGGAAGCAACTAATGAGGGGCTCTCATTTGTCACGGAAGCACTCACTCTCTTCTTGAACCAAGTGT<br>CCAGCCAGGCTGGTGTATGTA    | signal transducer and activator of transcription 1          |
| Stat2   | <a href="#">NM_010963.1</a>    | 1600010G07Rik, A1W96480                                                                                              | Cytoplasm,Nucleus,Plasma Membrane,Positive Regulation Of Transcription,Dna Dependent,Jak Stat Cascade,Positive Regulation Of Transcription From Rna Polymerase II Promoter,Signal Transduction,Transcription Dna Dependent,Sexual                                                                                                                       | TCAGTGAACCTCTGAAAGGGGCACTTCTGTTGGTGGAGCACCAGGATGACGTAAGTCTGAAATCTACTCA<br>GTGCGCCTACCAAGGAGT        | signal transducer and activator of transcription 2          |
| Stat3   | <a href="#">NM_213650.2</a>    | 1110034C02Rik, AW109958, Aprf                                                                                        | Reproduction,Protein Import Into Nucleus,Regulation Of Transcription,Dna Dependent,Intracellular Receptor Mediated Si                                                                                                                                                                                                                                   | GGGGTCACTTCACTGGGTGGAAAGGACATCACTGGCAAGCCAGATCAGTCTGTAGAGCCATACCAAGCA<br>GCAGCTGAACACATGCTATTG      | signal transducer and activator of transcription 3          |
| Tbx2r   | <a href="#">NM_001277265.1</a> | TP, TXA2-R                                                                                                           | Membrane,Integral To Membrane,Plasma Membrane,Signal Transduction,Inflammatory Response,Second Messenger Mediated Signaling,Positive Regulation Of Angiogenesis,G Protein Coupled Receptor Protein Signaling Pathway,G Protein Coupled Receptor Activity,Receptor Activity                                                                              | GCTCCTCTCTCTGCTGCTGCTGGGCTTCTTCCACGACTCTGGGGCTGCTAGTCAACGGGCCATCGTGG<br>GTGGCAACACGCTGCTTGT         | thromboxane A2 receptor                                     |
| Tcf4    | <a href="#">NM_013685.1</a>    | 5730422P05Rik, ASP-42, E2-2, E2-2, ITF-2, ITF-2b, ITF2, ME2, MTF-2A, MTF-2B, SEF-2, SEF2, SEF2-1, TFE, Tcf-4, hLHb19 | Nucleus,Transcription Factor Complex,Positive Regulation Of Transcription,Dna Dependent,Nervous System Development,Positive Regulation Of Transcription From Rna Polymerase II Promoter,Transcription Dna Dependent,Transcription Initiation,Protein Dna Complex Assembly,Multicellular Organismal Development,Regulation Of Transcription,Dna          | AATTACCGGATTTGAATGGGGAAGCCGCGCTGCCCTGTAAACAAACCAAGCTCTGATGGCAAGGAAGT<br>ATGACATTAGCCATCTTATGGG      | transcription factor 4                                      |

## Continue Table S1: Nanostring nCounter SC Mouse Inflammation V2 Panel Gene List

|                                 |                                |                                                                            |                                                                                                                                                                                                                                                                                                                                                                              |                                                                                                                                                                                            |                                                       |
|---------------------------------|--------------------------------|----------------------------------------------------------------------------|------------------------------------------------------------------------------------------------------------------------------------------------------------------------------------------------------------------------------------------------------------------------------------------------------------------------------------------------------------------------------|--------------------------------------------------------------------------------------------------------------------------------------------------------------------------------------------|-------------------------------------------------------|
| Tgfb1                           | <a href="#">NM_011577.1</a>    | TGF-beta1, TGFbeta1, Tgfb, Tgfb-1                                          | Proteinaceous Extracellular Matrix, Cell Surface Axon, Extracellular Region, Cytoplasm, Nucleus, Cell Soma, Secretory Granule, Extracellular Space, Extracellular Matrix, Regulation Of Transforming Growth Factor Beta Receptor Signaling Pathway, Positive Regulation Of Transcription, DNA Dependent, Positive Regulation Of Cell Proliferation, Regulation Of D          | GGAGTTGTACGGCAGTGGCGAACCAAGGAGCGGATACAGGGCTTGGATCCAGGCTCACTGCTCTGTGACAG<br>CAAGATACAACTCCACGGTGG                                                                                           | transforming growth factor, beta 1                    |
| Tgfb2                           | <a href="#">NM_009367.1</a>    | BB105277, Tgf-beta2, Tgfb-2                                                | Cell Surface, Axon, Extracellular Region, Basement Membrane, Cytoplasm, Cell Soma, Secretory Granule, Extracellular Space, Trans Golgi Network, Extracellular Matrix, Axon Guidance, Positive Regulation Of Cell Proliferation, Negative Regulation Of Apoptosis, Hemopoiesis, Skeletal Development, Epithelial To Mesenchymal Transition, Growth, Intercellular Junction    | CCCAAAGCCAGAGTGGCCGAGCGGATGAAGTATCAATGCTTAAATCCAAAGACTTAACCTCCACCCAG<br>CGCTACATGATGACAGAGGTTG                                                                                             | transforming growth factor, beta 2                    |
| Tgfb3                           | <a href="#">NM_009368.2</a>    | Tgfb-3                                                                     | Cell Surface, Extracellular Region, Cytoplasm, Nucleus, Cell Soma, Secretory Granule, Extracellular Space, Extracellular Matrix, Positive Regulation Of Transcription, DNA Dependent, Positive Regulation Of Transcription From Rna Polymerase II Promoter, Activation Of Mapk Activity, Organ Morphogenesis, Intercellular Junction Assembly And Maintenance, Post          | TCATGTAATGATTTCTGGCCGACCACTAGCTATCTCAGCTGCTTAGAGTGTGGCTGACCAAGAGAGCTGAGA<br>ATTGGTCTCTCATGTAATCC                                                                                           | transforming growth factor, beta 3                    |
| Tgfr1                           | <a href="#">NM_009370.2</a>    | ALK5, ALU17191, Alk-5, TbetaR4, TbetaRI                                    | Cell Junction, Tight Junction, Membrane, Integral To Membrane, Receptor Complex, Basolateral Plasma Membrane, Apical Plasma Membrane, Protein Complex, Plasma Membrane Part, Plasma Membrane, Positive Regulation Of Transcription, DNA Dependent, Positive Regulation Of Cell Proliferation, Negative Regulation Of Apoptosis, Signal Transduction, Skeletal Develop        | TCAGAAATGATGGCCAGCTGTCTCTAGTAGACAAATGAAGCTGAAGCTGAGCTGATCACTCTGCTACTACAGTA<br>GTACTCCAGAAAGCTGGCTGAG                                                                                       | transforming growth factor, beta receptor I           |
| Tr1                             | <a href="#">NM_030682.1</a>    |                                                                            | Intrinsic To Membrane, Membrane, Cytoplasmic Vesicle, Integral To Membrane, Plasma Membrane, Signal Transduction, Defense Response, Inflammatory Response, Immune Response, Innate Immune Response, Receptor Activity, Transmembrane Receptor Activity, Process, Heterodimerization Activity                                                                                 | TCAGCACTAGATGGTTTGGAACTGTCTACATCAAGTGTGCTTGAAGACAGGGGCTGCTTATTTCTACGTGC<br>TTTGTCAAAGCTTGGAAAGA                                                                                            | tol-like receptor 1                                   |
| Tlr2                            | <a href="#">NM_011905.2</a>    | Ly105                                                                      | External Side Of Plasma Membrane, Cell Surface, Intrinsic To Membrane, Membrane, Cytoplasm, Cytoplasmic Vesicle, Integral To Membrane, Plasma Membrane, Positive Regulation Of Transcription From Rna Polymerase II Promoter, Signal Transduction, Activation Of Nf-kappaB Transcription Factor, Inflammatory Response, Positive Regulation Of Cytokine Secretion            | CGAGGGGTCACTGGCGAGGATGTGTCGCAATCATATTTCTGATGGTGAAGTTGACGGCAGCTCTCGCAGC<br>CTAGAGTGGAAAGATGGTGTTC                                                                                           | tol-like receptor 2                                   |
| Tlr3                            | <a href="#">NM_126166.2</a>    | AI957183                                                                   | Cell Surface, Membrane, Cytoplasm, Endoplasmic Reticulum, Integral To Membrane, Endosome, Response To Virus, Positive Regulation Of Transcription From Rna Polymerase II Promoter, Signal Transduction, Defense Response, Activation Of Nf-kappaB Transcription Factor, Positive Regulation Of Nf-kappaB Kinase Nf-kappaB Cascade, Defense Response To Virus, Infla          | TTTCTGGGCTGAAGTGGACAACTCACCAGCTCGATTTCTTCAACAACCTCCATGATGTGGCAGCGGTTCC<br>TTTCTCTATCCGACGGCTG                                                                                              | tol-like receptor 3                                   |
| Tlr4                            | <a href="#">NM_021297.2</a>    | Lps, Ly87, Ran/MI, Ral2-6                                                  | External Side Of Plasma Membrane, Cell Surface, Membrane, Cytoplasm, Penetrator Region Of Cytoplasm, Integral To Membrane, Lipid Raft, Integral To Plasma Membrane, Plasma Membrane, Positive Regulation Of Transcription From Rna Polymerase II Promoter, Signal Transduction, Activation Of Mapk Activity, Activation Of Nf-kappaB Transcription Factor, Post              | AACGCCAATCTGACCTGAGGAGCAAACTCTGGGGCTCAAAACAGCTGTTGCAATTAATAATGCTACAGCT<br>CACTGGGCGCTGCTGATGAC                                                                                             | tol-like receptor 4                                   |
| Tlr5                            | <a href="#">NM_016928.2</a>    |                                                                            | Membrane, Integral To Membrane, Membrane Fraction, Signal Transduction, Inflammatory Response, Innate Immune Response, Receptor Activity                                                                                                                                                                                                                                     | TCGGGAGCCAGATGCTGACCTGTCAGGAGGCTTCCAGAACCTCCCAACTTAGGATCTGGACTG<br>GGCCAAAGCCAGATGGAAGTCT                                                                                                  | tol-like receptor 5                                   |
| Tlr6                            | <a href="#">NM_011604.3</a>    |                                                                            | Intrinsic To Membrane, Membrane, Cytoplasmic Vesicle, Integral To Membrane, Plasma Membrane, Signal Transduction, Positive Regulation Of Nf-kappaB Kinase Nf-kappaB Cascade, Inflammatory Response, Immune Response, Defense Response To Bacterium, Positive Regulation Of Jnk Activity, Innate Immune Response, Receptor Activity, Transmembrane Receptor Activity          | ACCTGGATGCTCACACAATGGTGGAAATCTCTTCTGGCCCTTAGGGAGCTGAGGAGCTAGAAGCTCTCAT<br>TCAATGACTTGTGTAAGTCC                                                                                             | tol-like receptor 6                                   |
| Tlr7                            | <a href="#">NM_133211.3</a>    |                                                                            | Membrane, Cytoplasm, Endoplasmic Reticulum, Cytoplasmic Vesicle, Integral To Membrane, Endosome, Lysosome, Plasma Membrane, Signal Transduction, Defense Response To Virus, Inflammatory Response, Response To Chemical Stimulus, Innate Immune Response, Drug Binding, Double Stranded Rna Binding, Receptor Activity, Single Stranded Rna Binding                          | TCTGAGGAGCTGTCTGAGTGGCCGTAACAATCCAGGCTACCCATACTCTGGCAGCTGCAAAATGGCC<br>TGACCACAGCAATCATGTGGC                                                                                               | tol-like receptor 7                                   |
| Tlr8                            | <a href="#">NM_133212.2</a>    |                                                                            | Membrane, Integral To Membrane, Response To Virus, Signal Transduction, I-kappaB Kinase Nf-kappaB Cascade, Defense Response To Virus, Inflammatory Response, Innate Immune Response, Double Stranded Rna Binding, Receptor Activity, Dna Binding, Single Stranded Rna Binding                                                                                                | TCATAAAGCGAATTCAGAGACTCTCTGTGAGGAGTAAGGACACACTGGTGTGATGAGCAGATCGACC<br>ATGGCAACTGCATGAAGTCC                                                                                                | tol-like receptor 8                                   |
| Tlr9                            | <a href="#">NM_031178.2</a>    |                                                                            | Membrane, Cytoplasm, Endoplasmic Reticulum, Cytoplasmic Vesicle, Integral To Membrane, Endosome, Basolateral Plasma Membrane, Apical Plasma Membrane, Lysosome, Plasma Membrane, Response To Virus, Positive Regulation Of Transcription From Rna Polymerase II Promoter, Signal Transduction, Activation Of Nf-kappaB Transcription Factor, Positive Regulation Of          | GGCCAAATTCAGTTTGTGACCACTGTCTGCTACAGAGCTTAGGCTGCCACACATGACATCATACCGTG<br>TGCTCCACATCTCAACAGCA                                                                                               | tol-like receptor 9                                   |
| Tnfr                            | <a href="#">NM_013693.1</a>    | DIF, TNF-alpha, TNFSF2, TNFalpha, Tnfa, Tnfa1a                             | External Side Of Plasma Membrane, Cell Surface, Extracellular Region, Membrane, Integral To Membrane, Lipid Raft, Integral To Plasma Membrane, Secretory Granule, Extracellular Space, Plasma Membrane, Response To Virus, Glucose Metabolic Process, Positive Regulation Of Transcription, DNA Dependent, Positive Regulation Of Cell Proliferation, Negative Regula        | TTCTGAGTCTGCAAGGGAGAGTGGTCAAGTGGCTGTCTCAGAGTAGGCTGGATGAAGATCTCAGGCTCTCT<br>ACTTGACACTTCCAGACTC                                                                                             | tumor necrosis factor                                 |
| Tnfr3                           | <a href="#">NM_009397.2</a>    | A20, Tnfr3                                                                 | Cytoplasm, Nucleus, Centrosome, Proteolysis, Anti Apoptosis, Response To Wounding, Apoptosis, Gs Kinase Binding, Zinc Ion Binding, Ligase Activity, Ubiquitin Binding, Cytokine Type Peptidase Activity, Peptidase Activity, Dna Binding, Ubiquitin Protein Ligase Activity                                                                                                  | GGCTGAACAATCTTCTCAGGCTTGTATTTGAGCAATGGCGAAAGCTGTGAAGATAGGAGAGAACCCGAC<br>AAGACATTTCAAACTCAAT                                                                                               | tumor necrosis factor, alpha-induced protein 3        |
| Tnfrsf14                        | <a href="#">NM_019418.2</a>    | HVEM-L, HVEM-L, LIGHT, LTg, Ly113                                          | Extracellular Region, Membrane, Integral To Membrane, Extracellular Space, Plasma Membrane, Immune Response, Receptor Binding, Cytokine Activity                                                                                                                                                                                                                             | CAGTAAAGAAAGTCAAGCTGGGGTATTTATGCTCTGATGCAAAACAGTAGATTTGGGCTTTCTGGTTTGGAGCTG<br>GAGCCAGAAACCTCCAGAG                                                                                         | tumor necrosis factor (ligand) superfamily, member 14 |
| Tollp                           | <a href="#">NM_023764.3</a>    | 4930403G24Rk, 4931428G15Rk                                                 | Cytoplasm, Penetrator Region Of Cytoplasm, Nuclear Body, Signal Transduction, Inflammatory Response, Innate Immune Response, Phosphorylation, Kinase Binding                                                                                                                                                                                                                 | CTCAGCATCTGTGTACAGGCAAAATGGCAAGAAATGGCATGACTGTATGACCTACTGCTGCTGCTGCT<br>CTGGCTATGCTTTTAAAGAA                                                                                               | tol interacting protein                               |
| Tradd                           | <a href="#">NM_001033161.2</a> | 9130005N23Rk, AA930854                                                     | Cytoplasm, Cytoskeleton, Lipid Raft, Receptor Complex, Protein Complex, Signal Transduction, Positive Regulation Of I-kappaB Kinase Nf-kappaB Cascade, Regulation Of Apoptosis, Apoptosis, Gs Kinase Binding, Identical Protein Binding, Molecular Adaptor Activity, Protein Complex Binding                                                                                 | AGTACTCTGCGAGTTGCAAGTCCCGGTTCTCTCCGACGAGGAGAAACCACTGCCGCCGCTCCAGACT<br>TTTCTTGCCAGCGGAGCTGCT                                                                                               | TNFRSF1A-associated via death domain                  |
| Traf2                           | <a href="#">NM_009422.2</a>    | A1325259                                                                   | Cytoplasm, Cell Cortex, Lipid Raft, Protein Complex, Signal Transduction, Cellular Protein Complex Assembly, Activation Of Nf-kappaB Transcription Factor, Regulation Of Jnk Cascade, Positive Regulation Of Transcription Factor Activity, Protein Catabolic Process, Anti Apoptosis, Plasma Membrane, Response To Virus, Positive Regulation Of Jnk Activity, Regulation O | CACAAGCTGTGCTGTCTGATGAAAGGCTGTATGAAAGGACTTCTATTGAGAGATGTTGGGCTTTCA<br>GATAACGCTGCCCGAGAGAG                                                                                                 | TNF receptor-associated factor 2                      |
| Trem2                           | <a href="#">NM_031254.2</a>    | TREM2, Trem2a, Trem2b, Trem2c                                              | Extracellular Region, Membrane, Integral To Membrane, Plasma Membrane, Receptor Activity, Transmembrane Receptor Activity                                                                                                                                                                                                                                                    | GAATCAAGAGACTCTCCACDCACTCATTTCTCTCTGCTGGCTGGTCTCTGAGGAAGTTCTTGAGGCTC<br>GACTCTCTGGCTGTGGCC                                                                                                 | triggering receptor expressed on myeloid cells 2      |
| Tslp                            | <a href="#">NM_021267.1</a>    |                                                                            | Extracellular Region, Extracellular Space, Cytokine Activity                                                                                                                                                                                                                                                                                                                 | CTGACTGTTAATGACAGCTCTGGAAGTGTCTTCCACCTCCCTGCACACACTACTCTAGGGCAACCAACTG<br>TAGTAGAAGAGAAATGGAAG                                                                                             | thymic stromal lymphopoietin                          |
| Twist2                          | <a href="#">NM_007855.2</a>    | Dermo1, bHLHa39                                                            | Cytoplasm, Nucleus, Transcription Factor Complex, Negative Regulation Of Apoptosis, Transcription Dna Dependent, Negative Regulation Of Transcription Dna Dependent, Multicellular Organismal Development, Regulation Of Transcription From Rna Polymerase II Promoter, Negative Regulation Of Dna Binding, Regulation Of Transcription, DNA Dependent, Negative             | GTGACTGTTGAGGAGCTGGAATCTTGGCCGATACCTCTGTTTAAAGTCTCCATGGCTGCTCAGCTAGCC<br>GTGTTTCTATTCCTGCTCAG                                                                                              | twist basic helix-loop-helix transcription factor 2   |
| <b>Internal Reference Genes</b> |                                |                                                                            |                                                                                                                                                                                                                                                                                                                                                                              |                                                                                                                                                                                            |                                                       |
| Ctct                            | <a href="#">NM_001003908.1</a> | 3110065L21Rk, CHC, R74732                                                  | Membrane, Spindle, Cytoplasmic Vesicle, Clathrin Coated Vesicle, Membrane Fraction, Membrane Coat, Mitochondrion, Intracellular Protein Transport, Vesicle Mediated Transport, Mitosis, Receptor Mediated Endocytosis, Peptide Binding, Structural Molecule Activity, Prote                                                                                                  | GAGTCTACGCCAGGAAATTTGATGCTACTTAGGCTCCAGGATGCCAGATCAATACCGTACAGATGCA<br>AAGCAAAATGTTGCTCTCA<br>AGTTGTTCTCTGGACTTCAAGCAACCTCCACTCTCCACTTGGATGCGGGGCTGGACTTCTCAATGACA<br>ACTTTTCAAGCTCATTTCTG | clathrin, heavy polypeptide (Hc)                      |
| Gsd3h                           | <a href="#">NM_001001303.1</a> | Gsd3h                                                                      | Endoplasmic Reticulum, Microsome, Lysosome, Soluble Fraction, Carbohydrate Metabolic Process, Sugar Binding, Cation Binding, Hydrolase Activity, Acting On Glycosyl Bonds, Hydrolase Activity, Hydrolyzing O-glycosyl Compounds                                                                                                                                              | AATACGTGGTGGAGACTCATCTGAAATTTGGCCGACTCATGAGAACCCAGTCCAGTGAAGTATGGAAAC<br>AAGAAGGGATCTTCACTGCA                                                                                              | glyceroldehyde-3-phosphate dehydrogenase              |
| Gusb                            | <a href="#">NM_010368.1</a>    | g Gsd, Gur, asd, adipose storage deficiency, Gus+, Gus-, Gus+4, Gus+4, Gus | Cytoplasm, Cytosol Soluble Fraction, Carbohydrate Metabolic Process, Phosphorylation, Nucleotide Binding, Kinase Activity, Adp Binding, Atp Binding                                                                                                                                                                                                                          | CCGGATCTGCAAGCTCAAAGCGCACTGTCGCGCGTCTTCTCTCTCATCTCGGCGGTTGCACTTCC<br>GGTGTGCCAAATGGTGCT                                                                                                    | glucuronidase, beta                                   |
| Pgk1                            | <a href="#">NM_008828.2</a>    | Pgk-1                                                                      |                                                                                                                                                                                                                                                                                                                                                                              |                                                                                                                                                                                            | phosphoglycerate kinase 1                             |



## Continue Table S1: Nanostring nCounter SC Mouse Inflammation V2 Panel Gene List

|                                |                             |                                           |                                                                                                                                                                                                                                                         |                                                                                            |                         |
|--------------------------------|-----------------------------|-------------------------------------------|---------------------------------------------------------------------------------------------------------------------------------------------------------------------------------------------------------------------------------------------------------|--------------------------------------------------------------------------------------------|-------------------------|
| Tabb5                          | <a href="#">NM_011655.4</a> | AA408537, AI596182, B130022C14Rik, Mbeta5 | Cytoplasm, Cytoskeleton, Microtubule, Protein Complex, Microtubule Based Process, Protein Polymerization, Microtubule Based Movement, Gtp Binding, Nucleotide Binding, Protein Complex Binding, Structural Molecule Activity, Structural Constituent Of | ATTGGAAAGTGTCTCCCTGTATTGGTTCTCTCTCGGAGAGATGGGGTTGGGGTGGGCAAGTCTTGCTTTGGTCTCTGAACTCCCAATTCC | tubulin, beta 5 class I |
| © 2013 Nanostring Technologies |                             |                                           | UBK-10041                                                                                                                                                                                                                                               |                                                                                            |                         |

## Supplemental Table 2: Nanostrings nCounter Mouse Custom Code Set Gene List

### Table S2: Nanostring nCounter SC Mouse Custom Code Set Gene List

| CODESET DETAILS     |             |           |                                                                                                       |       |       |       |           |  |  |
|---------------------|-------------|-----------|-------------------------------------------------------------------------------------------------------|-------|-------|-------|-----------|--|--|
| Customer Identifier | Accession   | Position  | Target Sequence                                                                                       | Tm CP | Tm RP | Flags | HUGO Gene |  |  |
| 1 lbabp             | NM_008375.2 | 163-262   | ATCACAGAGGTCCAGCAGGACGGACAGGACTTCACTGGTCCCACTTACTCTGGGGCAACATTATGAGCAACAAGTCCACCATTGGCAAAGAAATGTG     | 83    | 82    |       | Fabp6     |  |  |
| 2 Fgf15             | NM_008003.2 | 316-415   | TCCGCTGGTCCCTATGTCTCAAAGTCTTCCGAAATCCGGAGCGACGCGCTCTGTGGACTGCCAGGAGGACCAAAACGAAACGAAATTTGGAAATTC      | 83    | 82    |       | Fgf15     |  |  |
| 3 TGR5              | NM_174985.1 | 386-485   | TCACCTGGGTACGCTCCCTGTTCTTGGCAGCCTGCCTGCTCTGGGCTGGAAACATTGGAGCCCTGATGCCAACTGCAGCTCCCAAGCTGTCTCCAGC     | 85    | 84    |       | Gpbar1    |  |  |
| 4 MMP10             | NM_019471.2 | 1051-1150 | CAGACTTAGATGCTGCCTATGAGGCTCACACACGGACAGTTCGATTTTAAAGGAAGTCACTTGGGCGAGTCCGAGGAAATGAAGTCCAAGCAGG        | 82    | 82    |       | Mmp10     |  |  |
| 5 MMP-2             | NM_008610.2 | 2377-2476 | AGTTAACCAAGCCCTTCTCCTCACCTGGTGAAGTTCAGATTTAAGAGGGTGGCTCTTTTGTGCCAAAGAAAGGTGCTGACTGTACCCCTCCCGGGTGGCTG | 81    | 82    |       | Mmp2      |  |  |
| 6 MMP-7             | NM_010810.4 | 351-450   | CACCTACAGAATTGTATCCCTATACTTACAGACTTACCTGGATCGTAGTGGATCAAAATCGTGAAAAAGCTCTCAGAATGTGGAGTATGCAGATCCCACTG | 78    | 82    |       | Mmp7      |  |  |
| 7 FXR               | NM_009108.2 | 1176-1275 | CAGTTTCTATAAAAGTGTGGGAACTCAAAATGACTCAGGAGGAGTACGCTCTGCTCACAGCGATCGTCATCCTCTCTCCAACAACAATACATCAAG      | 79    | 83    |       | Nr1h4     |  |  |
| 8 ASBT (Ibat)       | NM_011388.2 | 661-760   | CATTGTGCTCATAGCTGTGATTGGAGGAATCTGTACCAAGTGCCTGGATCATTGAACCCAAACTGTGGATTATAGGAACAATATCCCTATAGCTGGC     | 84    | 81    |       | Slc10a2   |  |  |
| 9 OSTalpha          | NM_145932.3 | 1213-1312 | CCTCCTACTCTTCTAAAATCAGGTCTCAAGTGATGAACTGCCACATGCTCATACTGGAGACCTTCTGATGACAGTGTGACACGAATGTACTATCGAA     | 83    | 85    |       | Slc51a    |  |  |
| 10 OSTBeta          | NM_178933.2 | 196-295   | ATGCAAGCATGTTCCCTCTGAGAAGGAGCATCTGGCAAAACAGAAATCGAAAAGCAGCCCAAGAACAAAGAAACAACAGAAAGCCTGCATCTTGATG     | 79    | 78    |       | Slc51b    |  |  |
